# Supplementary material for: Uterus-specific transcriptional regulation underlies eggshell pigment production in Japanese quail
Source: PLoS One. 2022 Mar 10;17(3):e0265008. doi: 10.1371/journal.pone.0265008 (PMC8912178; doi:10.1371/journal.pone.0265008)
Supplement: S8 Data — Data of five samples from both wild-type and mutant quails that were not used for mRNA sequencing. (XLSX) [file pone.0265008.s016.xlsx]

## Sheet: Sample Setup
Block Type	96well
Chemistry	SYBR_GREEN
Experiment File Name	D:\Applied Biosystems\StepOne Software v2.3\experiments\ishishita\180115_17hALAS1_WildvsMut.eds
Experiment Run End Time	2019-01-15 10:58:42 AM PST
Instrument Type	steponeplus
Passive Reference	ROX
Well	Sample Name	Sample Color	Biogroup Name	Biogroup Color	Target Name	Target Color	Task	Reporter	Quencher	Comments
A1	17hWE1	RGB(255,102,0)	we	RGB(255,204,153)	actb	RGB(139,189,249)	UNKNOWN	SYBR	None
A2	17hWE1	RGB(255,102,0)	we	RGB(255,204,153)	actb	RGB(139,189,249)	UNKNOWN	SYBR	None
A3	17hWE1	RGB(255,102,0)	we	RGB(255,204,153)	actb	RGB(139,189,249)	UNKNOWN	SYBR	None
A4	17hWE1	RGB(255,102,0)	we	RGB(255,204,153)	ALAS1_2F2R	RGB(0,255,255)	UNKNOWN	SYBR	None
A5	17hWE1	RGB(255,102,0)	we	RGB(255,204,153)	ALAS1_2F2R	RGB(0,255,255)	UNKNOWN	SYBR	None
A6	17hWE1	RGB(255,102,0)	we	RGB(255,204,153)	ALAS1_2F2R	RGB(0,255,255)	UNKNOWN	SYBR	None
A7	17hqPCR2	RGB(0,0,255)	wt	RGB(180,255,0)	actb	RGB(139,189,249)	UNKNOWN	SYBR	None
A8	17hqPCR2	RGB(0,0,255)	wt	RGB(180,255,0)	actb	RGB(139,189,249)	UNKNOWN	SYBR	None
A9	17hqPCR2	RGB(0,0,255)	wt	RGB(180,255,0)	actb	RGB(139,189,249)	UNKNOWN	SYBR	None
A10	17hqPCR2	RGB(0,0,255)	wt	RGB(180,255,0)	ALAS1_2F2R	RGB(0,255,255)	UNKNOWN	SYBR	None
A11	17hqPCR2	RGB(0,0,255)	wt	RGB(180,255,0)	ALAS1_2F2R	RGB(0,255,255)	UNKNOWN	SYBR	None
A12	17hqPCR2	RGB(0,0,255)	wt	RGB(180,255,0)	ALAS1_2F2R	RGB(0,255,255)	UNKNOWN	SYBR	None
B1	17hWE2	RGB(132,193,241)	we	RGB(255,204,153)	actb	RGB(139,189,249)	UNKNOWN	SYBR	None
B2	17hWE2	RGB(132,193,241)	we	RGB(255,204,153)	actb	RGB(139,189,249)	UNKNOWN	SYBR	None
B3	17hWE2	RGB(132,193,241)	we	RGB(255,204,153)	actb	RGB(139,189,249)	UNKNOWN	SYBR	None
B4	17hWE2	RGB(132,193,241)	we	RGB(255,204,153)	ALAS1_2F2R	RGB(0,255,255)	UNKNOWN	SYBR	None
B5	17hWE2	RGB(132,193,241)	we	RGB(255,204,153)	ALAS1_2F2R	RGB(0,255,255)	UNKNOWN	SYBR	None
B6	17hWE2	RGB(132,193,241)	we	RGB(255,204,153)	ALAS1_2F2R	RGB(0,255,255)	UNKNOWN	SYBR	None
B7	17hP1	RGB(153,51,102)	wt	RGB(180,255,0)	actb	RGB(139,189,249)	UNKNOWN	SYBR	None
B8	17hP1	RGB(153,51,102)	wt	RGB(180,255,0)	actb	RGB(139,189,249)	UNKNOWN	SYBR	None
B9	17hP1	RGB(153,51,102)	wt	RGB(180,255,0)	actb	RGB(139,189,249)	UNKNOWN	SYBR	None
B10	17hP1	RGB(153,51,102)	wt	RGB(180,255,0)	ALAS1_2F2R	RGB(0,255,255)	UNKNOWN	SYBR	None
B11	17hP1	RGB(153,51,102)	wt	RGB(180,255,0)	ALAS1_2F2R	RGB(0,255,255)	UNKNOWN	SYBR	None
B12	17hP1	RGB(153,51,102)	wt	RGB(180,255,0)	ALAS1_2F2R	RGB(0,255,255)	UNKNOWN	SYBR	None
C1	17hWE3	RGB(168,255,222)	we	RGB(255,204,153)	actb	RGB(139,189,249)	UNKNOWN	SYBR	None
C2	17hWE3	RGB(168,255,222)	we	RGB(255,204,153)	actb	RGB(139,189,249)	UNKNOWN	SYBR	None
C3	17hWE3	RGB(168,255,222)	we	RGB(255,204,153)	actb	RGB(139,189,249)	UNKNOWN	SYBR	None
C4	17hWE3	RGB(168,255,222)	we	RGB(255,204,153)	ALAS1_2F2R	RGB(0,255,255)	UNKNOWN	SYBR	None
C5	17hWE3	RGB(168,255,222)	we	RGB(255,204,153)	ALAS1_2F2R	RGB(0,255,255)	UNKNOWN	SYBR	None
C6	17hWE3	RGB(168,255,222)	we	RGB(255,204,153)	ALAS1_2F2R	RGB(0,255,255)	UNKNOWN	SYBR	None
C7	17hP2	RGB(132,193,241)	wt	RGB(180,255,0)	actb	RGB(139,189,249)	UNKNOWN	SYBR	None
C8	17hP2	RGB(132,193,241)	wt	RGB(180,255,0)	actb	RGB(139,189,249)	UNKNOWN	SYBR	None
C9	17hP2	RGB(132,193,241)	wt	RGB(180,255,0)	actb	RGB(139,189,249)	UNKNOWN	SYBR	None
C10	17hP2	RGB(132,193,241)	wt	RGB(180,255,0)	ALAS1_2F2R	RGB(0,255,255)	UNKNOWN	SYBR	None
C11	17hP2	RGB(132,193,241)	wt	RGB(180,255,0)	ALAS1_2F2R	RGB(0,255,255)	UNKNOWN	SYBR	None
C12	17hP2	RGB(132,193,241)	wt	RGB(180,255,0)	ALAS1_2F2R	RGB(0,255,255)	UNKNOWN	SYBR	None
D1	17hWE4	RGB(247,255,168)	we	RGB(255,204,153)	actb	RGB(139,189,249)	UNKNOWN	SYBR	None
D2	17hWE4	RGB(247,255,168)	we	RGB(255,204,153)	actb	RGB(139,189,249)	UNKNOWN	SYBR	None
D3	17hWE4	RGB(247,255,168)	we	RGB(255,204,153)	actb	RGB(139,189,249)	UNKNOWN	SYBR	None
D4	17hWE4	RGB(247,255,168)	we	RGB(255,204,153)	ALAS1_2F2R	RGB(0,255,255)	UNKNOWN	SYBR	None
D5	17hWE4	RGB(247,255,168)	we	RGB(255,204,153)	ALAS1_2F2R	RGB(0,255,255)	UNKNOWN	SYBR	None
D6	17hWE4	RGB(247,255,168)	we	RGB(255,204,153)	ALAS1_2F2R	RGB(0,255,255)	UNKNOWN	SYBR	None
D7	17hP3	RGB(168,255,222)	wt	RGB(180,255,0)	actb	RGB(139,189,249)	UNKNOWN	SYBR	None
D8	17hP3	RGB(168,255,222)	wt	RGB(180,255,0)	actb	RGB(139,189,249)	UNKNOWN	SYBR	None
D9	17hP3	RGB(168,255,222)	wt	RGB(180,255,0)	actb	RGB(139,189,249)	UNKNOWN	SYBR	None
D10	17hP3	RGB(168,255,222)	wt	RGB(180,255,0)	ALAS1_2F2R	RGB(0,255,255)	UNKNOWN	SYBR	None
D11	17hP3	RGB(168,255,222)	wt	RGB(180,255,0)	ALAS1_2F2R	RGB(0,255,255)	UNKNOWN	SYBR	None
D12	17hP3	RGB(168,255,222)	wt	RGB(180,255,0)	ALAS1_2F2R	RGB(0,255,255)	UNKNOWN	SYBR	None
E1	17hWE5	RGB(0,255,0)	we	RGB(255,204,153)	actb	RGB(139,189,249)	UNKNOWN	SYBR	None
E2	17hWE5	RGB(0,255,0)	we	RGB(255,204,153)	actb	RGB(139,189,249)	UNKNOWN	SYBR	None
E3	17hWE5	RGB(0,255,0)	we	RGB(255,204,153)	actb	RGB(139,189,249)	UNKNOWN	SYBR	None
E4	17hWE5	RGB(0,255,0)	we	RGB(255,204,153)	ALAS1_2F2R	RGB(0,255,255)	UNKNOWN	SYBR	None
E5	17hWE5	RGB(0,255,0)	we	RGB(255,204,153)	ALAS1_2F2R	RGB(0,255,255)	UNKNOWN	SYBR	None
E6	17hWE5	RGB(0,255,0)	we	RGB(255,204,153)	ALAS1_2F2R	RGB(0,255,255)	UNKNOWN	SYBR	None
E7	17hP4	RGB(223,221,142)	wt	RGB(180,255,0)	actb	RGB(139,189,249)	UNKNOWN	SYBR	None
E8	17hP4	RGB(223,221,142)	wt	RGB(180,255,0)	actb	RGB(139,189,249)	UNKNOWN	SYBR	None
E9	17hP4	RGB(223,221,142)	wt	RGB(180,255,0)	actb	RGB(139,189,249)	UNKNOWN	SYBR	None
E10	17hP4	RGB(223,221,142)	wt	RGB(180,255,0)	ALAS1_2F2R	RGB(0,255,255)	UNKNOWN	SYBR	None
E11	17hP4	RGB(223,221,142)	wt	RGB(180,255,0)	ALAS1_2F2R	RGB(0,255,255)	UNKNOWN	SYBR	None
E12	17hP4	RGB(223,221,142)	wt	RGB(180,255,0)	ALAS1_2F2R	RGB(0,255,255)	UNKNOWN	SYBR	None
F1					actb	RGB(139,189,249)	NTC	SYBR	None
F2					actb	RGB(139,189,249)	NTC	SYBR	None
F3					actb	RGB(139,189,249)	NTC	SYBR	None
F4					ALAS1_2F2R	RGB(0,255,255)	NTC	SYBR	None
F5					ALAS1_2F2R	RGB(0,255,255)	NTC	SYBR	None
F6					ALAS1_2F2R	RGB(0,255,255)	NTC	SYBR	None
F7					actb	RGB(139,189,249)	NTC	SYBR	None
F8					actb	RGB(139,189,249)	NTC	SYBR	None
F9					actb	RGB(139,189,249)	NTC	SYBR	None
F10					ALAS1_2F2R	RGB(0,255,255)	NTC	SYBR	None
F11					ALAS1_2F2R	RGB(0,255,255)	NTC	SYBR	None
F12					ALAS1_2F2R	RGB(0,255,255)	NTC	SYBR	None
G1
G2
G3
G4
G5
G6
G7
G8
G9
G10
G11
G12
H1
H2
H3
H4
H5
H6
H7
H8
H9
H10
H11
H12

## Sheet: Results
Block Type	96well
Chemistry	SYBR_GREEN
Experiment File Name	D:\Applied Biosystems\StepOne Software v2.3\experiments\ishishita\180115_17hALAS1_WildvsMut.eds
Experiment Run End Time	2019-01-15 10:58:42 AM PST
Instrument Type	steponeplus
Passive Reference	ROX
Well	Sample Name	Target Name	Task	Reporter	Quencher	RQ	RQ Min	RQ Max	Cт	Cт Mean	Cт SD	ΔCт	ΔCт Mean	ΔCт SE	HK Control ΔCт Mean	HK Control ΔCт SE	ΔΔCт	Automatic Ct Threshold	Ct Threshold	Automatic Baseline	Baseline Start	Baseline End	Efficiency	Tm1	Tm2	Tm3	Comments	BADROX	NOSIGNAL	MTP
A1	17hWE1	actb	UNKNOWN	SYBR	None				20.3319	20.5804	0.278083							TRUE	1.40129	TRUE	3	14	1	81.5597				N	N	N
A2	17hWE1	actb	UNKNOWN	SYBR	None				20.5286	20.5804	0.278083							TRUE	1.40129	TRUE	3	13	1	81.4105				N	N	N
A3	17hWE1	actb	UNKNOWN	SYBR	None				20.8807	20.5804	0.278083							TRUE	1.40129	TRUE	3	14	1	81.5616				N	N	N
A4	17hWE1	ALAS1_2F2R	UNKNOWN	SYBR	None	1	0.66062	1.51373	22.3361	22.6228	0.248777		2.0424	0.215422			0	TRUE	2.73056	TRUE	3	14	1	84.0971				Y	N	N
A5	17hWE1	ALAS1_2F2R	UNKNOWN	SYBR	None	1	0.66062	1.51373	22.7505	22.6228	0.248777		2.0424	0.215422			0	TRUE	2.73056	TRUE	3	14	1	83.9489				N	N	N
A6	17hWE1	ALAS1_2F2R	UNKNOWN	SYBR	None	1	0.66062	1.51373	22.7817	22.6228	0.248777		2.0424	0.215422			0	TRUE	2.73056	TRUE	3	14	1	83.9489				N	N	N
A7	17hqPCR2	actb	UNKNOWN	SYBR	None				20.6131	20.6392	0.251367							TRUE	1.40129	TRUE	3	13	1	81.7096	76.0398			N	N	Y
A8	17hqPCR2	actb	UNKNOWN	SYBR	None				20.9027	20.6392	0.251367							TRUE	1.40129	TRUE	3	14	1	81.5604				N	N	N
A9	17hqPCR2	actb	UNKNOWN	SYBR	None				20.402	20.6392	0.251367							TRUE	1.40129	TRUE	3	13	1	81.6882				N	N	N
A10	17hqPCR2	ALAS1_2F2R	UNKNOWN	SYBR	None	3.47718	2.60192	4.64688	20.8054	20.8837	0.0701726		0.244479	0.150676			-1.79792	TRUE	2.73056	TRUE	3	13	1	84.0791				N	N	N
A11	17hqPCR2	ALAS1_2F2R	UNKNOWN	SYBR	None	3.47718	2.60192	4.64688	20.9049	20.8837	0.0701726		0.244479	0.150676			-1.79792	TRUE	2.73056	TRUE	3	13	1	83.9302				Y	N	N
A12	17hqPCR2	ALAS1_2F2R	UNKNOWN	SYBR	None	3.47718	2.60192	4.64688	20.9408	20.8837	0.0701726		0.244479	0.150676			-1.79792	TRUE	2.73056	TRUE	3	13	1	83.9302				N	N	N
B1	17hWE2	actb	UNKNOWN	SYBR	None				20.9388	21.0698	0.115609							TRUE	1.40129	TRUE	3	14	1	81.4105				N	N	N
B2	17hWE2	actb	UNKNOWN	SYBR	None				21.1575	21.0698	0.115609							TRUE	1.40129	TRUE	3	14	1	81.4105				N	N	N
B3	17hWE2	actb	UNKNOWN	SYBR	None				21.1131	21.0698	0.115609							TRUE	1.40129	TRUE	3	14	1	81.5616				N	N	N
B4	17hWE2	ALAS1_2F2R	UNKNOWN	SYBR	None	1.35061	1.1701	1.55895	22.6999	22.6786	0.0574937		1.60879	0.0745452			-0.433606	TRUE	2.73056	TRUE	3	15	1	84.0971				Y	N	N
B5	17hWE2	ALAS1_2F2R	UNKNOWN	SYBR	None	1.35061	1.1701	1.55895	22.6135	22.6786	0.0574937		1.60879	0.0745452			-0.433606	TRUE	2.73056	TRUE	3	14	1	83.9489				Y	N	N
B6	17hWE2	ALAS1_2F2R	UNKNOWN	SYBR	None	1.35061	1.1701	1.55895	22.7224	22.6786	0.0574937		1.60879	0.0745452			-0.433606	TRUE	2.73056	TRUE	3	14	1	83.9489				N	N	N
B7	17hP1	actb	UNKNOWN	SYBR	None				19.9068	20.4216	0.448784							TRUE	1.40129	TRUE	3	12	1	81.262				N	N	N
B8	17hP1	actb	UNKNOWN	SYBR	None				20.6279	20.4216	0.448784							TRUE	1.40129	TRUE	3	13	1	81.262				N	N	N
B9	17hP1	actb	UNKNOWN	SYBR	None				20.7302	20.4216	0.448784							TRUE	1.40129	TRUE	3	13	1	81.2398				N	N	N
B10	17hP1	ALAS1_2F2R	UNKNOWN	SYBR	None	6.34524	3.72783	10.8004	19.6866	19.7984	0.166561		-0.623278	0.276375			-2.66568	TRUE	2.73056	TRUE	3	11	1	84.0791				Y	N	N
B11	17hP1	ALAS1_2F2R	UNKNOWN	SYBR	None	6.34524	3.72783	10.8004	19.7187	19.7984	0.166561		-0.623278	0.276375			-2.66568	TRUE	2.73056	TRUE	3	12	1	83.9302				Y	N	N
B12	17hP1	ALAS1_2F2R	UNKNOWN	SYBR	None	6.34524	3.72783	10.8004	19.9898	19.7984	0.166561		-0.623278	0.276375			-2.66568	TRUE	2.73056	TRUE	3	12	1	83.9302				Y	N	N
C1	17hWE3	actb	UNKNOWN	SYBR	None				19.6304	19.9345	0.275193							TRUE	1.40129	TRUE	3	12	1	81.5597				N	N	N
C2	17hWE3	actb	UNKNOWN	SYBR	None				20.007	19.9345	0.275193							TRUE	1.40129	TRUE	3	13	1	81.5597				N	N	N
C3	17hWE3	actb	UNKNOWN	SYBR	None				20.1663	19.9345	0.275193							TRUE	1.40129	TRUE	3	14	1	81.5616				N	N	N
C4	17hWE3	ALAS1_2F2R	UNKNOWN	SYBR	None	0.974694	0.717001	1.325	22.0414	22.0139	0.0251966		2.07938	0.159547			0.0369784	TRUE	2.73056	TRUE	3	14	1	83.948				N	N	N
C5	17hWE3	ALAS1_2F2R	UNKNOWN	SYBR	None	0.974694	0.717001	1.325	21.9919	22.0139	0.0251966		2.07938	0.159547			0.0369784	TRUE	2.73056	TRUE	3	13	1	83.6505				N	N	N
C6	17hWE3	ALAS1_2F2R	UNKNOWN	SYBR	None	0.974694	0.717001	1.325	22.0084	22.0139	0.0251966		2.07938	0.159547			0.0369784	TRUE	2.73056	TRUE	3	13	1	83.6505				N	N	N
C7	17hP2	actb	UNKNOWN	SYBR	None				20.9424	21.2727	0.286569							TRUE	1.40129	TRUE	3	14	1	81.262				N	N	N
C8	17hP2	actb	UNKNOWN	SYBR	None				21.4207	21.2727	0.286569							TRUE	1.40129	TRUE	3	14	1	81.1128				N	N	N
C9	17hP2	actb	UNKNOWN	SYBR	None				21.455	21.2727	0.286569							TRUE	1.40129	TRUE	3	14	1	81.2398				N	N	N
C10	17hP2	ALAS1_2F2R	UNKNOWN	SYBR	None	4.44073	3.17589	6.20931	21.2239	21.1643	0.0943784		-0.1084	0.174192			-2.1508	TRUE	2.73056	TRUE	3	13	1	83.9297				Y	N	N
C11	17hP2	ALAS1_2F2R	UNKNOWN	SYBR	None	4.44073	3.17589	6.20931	21.0555	21.1643	0.0943784		-0.1084	0.174192			-2.1508	TRUE	2.73056	TRUE	3	13	1	83.9302				Y	N	N
C12	17hP2	ALAS1_2F2R	UNKNOWN	SYBR	None	4.44073	3.17589	6.20931	21.2135	21.1643	0.0943784		-0.1084	0.174192			-2.1508	TRUE	2.73056	TRUE	3	13	1	83.9302				Y	N	N
D1	17hWE4	actb	UNKNOWN	SYBR	None				21.2645	21.439	0.229666							TRUE	1.40129	TRUE	3	14	1	81.4105				N	N	N
D2	17hWE4	actb	UNKNOWN	SYBR	None				21.6992	21.439	0.229666							TRUE	1.40129	TRUE	3	14	1	81.4105				N	N	N
D3	17hWE4	actb	UNKNOWN	SYBR	None				21.3533	21.439	0.229666							TRUE	1.40129	TRUE	3	14	1	81.4124				N	N	N
D4	17hWE4	ALAS1_2F2R	UNKNOWN	SYBR	None	1.5224	1.13406	2.04372	22.736	22.8751	0.13228		1.43605	0.153019			-0.606351	TRUE	2.73056	TRUE	3	14	1	84.0971				N	N	N
D5	17hWE4	ALAS1_2F2R	UNKNOWN	SYBR	None	1.5224	1.13406	2.04372	22.89	22.8751	0.13228		1.43605	0.153019			-0.606351	TRUE	2.73056	TRUE	3	14	1	83.9489				N	N	N
D6	17hWE4	ALAS1_2F2R	UNKNOWN	SYBR	None	1.5224	1.13406	2.04372	22.9993	22.8751	0.13228		1.43605	0.153019			-0.606351	TRUE	2.73056	TRUE	3	15	1	83.9489				N	N	N
D7	17hP3	actb	UNKNOWN	SYBR	None				20.2946	20.6146	0.279366							TRUE	1.40129	TRUE	3	13	1	81.262				N	N	N
D8	17hP3	actb	UNKNOWN	SYBR	None				20.7395	20.6146	0.279366							TRUE	1.40129	TRUE	3	14	1	81.262				N	N	N
D9	17hP3	actb	UNKNOWN	SYBR	None				20.8097	20.6146	0.279366							TRUE	1.40129	TRUE	3	13	1	81.2398				N	N	N
D10	17hP3	ALAS1_2F2R	UNKNOWN	SYBR	None	2.94051	2.00662	4.30903	20.9541	21.1009	0.200588		0.486332	0.198562			-1.55607	TRUE	2.73056	TRUE	3	13	1	83.9297				Y	N	N
D11	17hP3	ALAS1_2F2R	UNKNOWN	SYBR	None	2.94051	2.00662	4.30903	21.0192	21.1009	0.200588		0.486332	0.198562			-1.55607	TRUE	2.73056	TRUE	3	13	1	83.9302				Y	N	N
D12	17hP3	ALAS1_2F2R	UNKNOWN	SYBR	None	2.94051	2.00662	4.30903	21.3295	21.1009	0.200588		0.486332	0.198562			-1.55607	TRUE	2.73056	TRUE	3	13	1	83.9302				Y	N	N
E1	17hWE5	actb	UNKNOWN	SYBR	None				20.8048	21.2421	0.433598							TRUE	1.40129	TRUE	3	14	1	81.5597				N	N	N
E2	17hWE5	actb	UNKNOWN	SYBR	None				21.6719	21.2421	0.433598							TRUE	1.40129	TRUE	3	14	1	81.4105				N	N	N
E3	17hWE5	actb	UNKNOWN	SYBR	None				21.2496	21.2421	0.433598							TRUE	1.40129	TRUE	3	14	1	81.5616				N	N	N
E4	17hWE5	ALAS1_2F2R	UNKNOWN	SYBR	None	0.734473	0.440703	1.22407	23.8602	23.7297	0.15272		2.48762	0.265412			0.445218	TRUE	2.73056	TRUE	3	14	1	83.948				N	N	N
E5	17hWE5	ALAS1_2F2R	UNKNOWN	SYBR	None	0.734473	0.440703	1.22407	23.5617	23.7297	0.15272		2.48762	0.265412			0.445218	TRUE	2.73056	TRUE	3	15	1	83.7997				N	N	N
E6	17hWE5	ALAS1_2F2R	UNKNOWN	SYBR	None	0.734473	0.440703	1.22407	23.7672	23.7297	0.15272		2.48762	0.265412			0.445218	TRUE	2.73056	TRUE	3	15	1	83.9489				Y	N	N
E7	17hP4	actb	UNKNOWN	SYBR	None				21.6731	21.6599	0.0119153							TRUE	1.40129	TRUE	3	14	1	81.1128				N	N	N
E8	17hP4	actb	UNKNOWN	SYBR	None				21.65	21.6599	0.0119153							TRUE	1.40129	TRUE	3	14	1	81.1128				N	N	N
E9	17hP4	actb	UNKNOWN	SYBR	None				21.6567	21.6599	0.0119153							TRUE	1.40129	TRUE	3	14	1	81.0904				N	N	N
E10	17hP4	ALAS1_2F2R	UNKNOWN	SYBR	None	1.81559	1.48645	2.2176	22.6723	22.8419	0.179623		1.18196	0.103933			-0.860437	TRUE	2.73056	TRUE	3	15	1	83.9297				Y	N	N
E11	17hP4	ALAS1_2F2R	UNKNOWN	SYBR	None	1.81559	1.48645	2.2176	22.8233	22.8419	0.179623		1.18196	0.103933			-0.860437	TRUE	2.73056	TRUE	3	15	1	83.7808				Y	N	N
E12	17hP4	ALAS1_2F2R	UNKNOWN	SYBR	None	1.81559	1.48645	2.2176	23.0301	22.8419	0.179623		1.18196	0.103933			-0.860437	TRUE	2.73056	TRUE	3	15	1	83.9302				Y	N	N
F1		actb	NTC	SYBR	None				Undetermined									TRUE	1.40129	TRUE	3	39	1	63.6576	73.5038	84.3942		Y	Y	Y
F2		actb	NTC	SYBR	None				Undetermined									TRUE	1.40129	TRUE	3	31	1	93.4945	61.5691	88.5714		Y	Y	Y
F3		actb	NTC	SYBR	None				Undetermined									TRUE	1.40129	TRUE	3	24	1	61.5753	93.3445	88.1242		Y	Y	Y
F4		ALAS1_2F2R	NTC	SYBR	None				Undetermined									TRUE	2.73056	TRUE	3	23	1	93.0462	63.5142	74.104		Y	Y	Y
F5		ALAS1_2F2R	NTC	SYBR	None				Undetermined									TRUE	2.73056	TRUE	3	10	1	61.715	86.7841	93.2007		Y	Y	Y
F6		ALAS1_2F2R	NTC	SYBR	None				Undetermined									TRUE	2.73056	TRUE	3	10	1	91.5592	75.5926	62.4611		Y	Y	Y
F7		actb	NTC	SYBR	None				Undetermined									TRUE	1.40129	TRUE	3	38	1	61.8652	92.9001	83.6493		Y	Y	Y
F8		actb	NTC	SYBR	None				Undetermined									TRUE	1.40129	TRUE	3	24	1	91.7065	61.4176	87.9763		Y	Y	Y
F9		actb	NTC	SYBR	None				Undetermined									TRUE	1.40129	TRUE	3	17	1	93.3442	62.2614	78.2511		Y	Y	Y
F10		ALAS1_2F2R	NTC	SYBR	None				Undetermined									TRUE	2.73056	TRUE	3	39	1	62.112	92.2981	80.4927		Y	Y	Y
F11		ALAS1_2F2R	NTC	SYBR	None				Undetermined									TRUE	2.73056	TRUE	3	26	1	92.2984	80.0451	69.7344		Y	Y	Y
F12		ALAS1_2F2R	NTC	SYBR	None				Undetermined									TRUE	2.73056	TRUE	3	21	1	61.3662	87.666	77.2059		Y	Y	Y
Analysis Type	Singleplex
Endogenous Control	actb
RQ Min/Max Confidence Level	95.0
Reference Sample	17hWE1

## Sheet: Raw Data
Block Type	96well
Chemistry	SYBR_GREEN
Experiment File Name	D:\Applied Biosystems\StepOne Software v2.3\experiments\ishishita\180115_17hALAS1_WildvsMut.eds
Experiment Run End Time	2019-01-15 10:58:42 AM PST
Instrument Type	steponeplus
Passive Reference	ROX
Well	Cycle	BLUE	GREEN	YELLOW	RED
A1	1	600	75	4067	7008
A2	1	1856	658	4818	7809
A3	1	92	-261	4061	7247
A4	1	4483	2241	5474	7430
A5	1	4255	2167	5580	7751
A6	1	4550	2357	6018	8270
A7	1	-146	-350	4084	8195
A8	1	598	743	5627	8770
A9	1	-576	-464	3855	6988
A10	1	2798	1414	4471	6503
A11	1	3483	1731	4686	6650
A12	1	3113	1605	4574	6530
B1	1	531	49	4094	7037
B2	1	-425	-513	3759	6975
B3	1	-278	-345	3897	7010
B4	1	4817	2433	6046	8224
B5	1	5009	2552	6329	8611
B6	1	4847	2510	6381	8667
B7	1	-375	-413	3885	7020
B8	1	1715	1015	5948	9219
B9	1	118	140	4599	7655
B10	1	4752	2405	6168	8557
B11	1	4267	2091	5259	7206
B12	1	4972	2569	6098	8257
C1	1	10	-284	3669	6606
C2	1	690	64	3975	6816
C3	1	-861	-666	3117	5944
C4	1	5363	2773	6360	8485
C5	1	5022	2543	6100	8288
C6	1	5217	2727	6339	8460
C7	1	-799	-690	3562	6635
C8	1	172	-151	4280	7485
C9	1	-723	-570	3561	6627
C10	1	4761	2475	5969	8081
C11	1	4497	2262	5489	7462
C12	1	3792	1932	5220	7307
D1	1	378	1	4115	7162
D2	1	921	401	4705	7767
D3	1	-355	-398	3899	7047
D4	1	4523	2299	5718	7879
D5	1	5186	2643	6260	8409
D6	1	5393	2821	6268	8273
D7	1	104	-127	4164	7225
D8	1	155	-107	4218	7320
D9	1	-463	-431	4128	7427
D10	1	4754	2493	6095	8259
D11	1	4548	2333	6039	8361
D12	1	3460	1761	5520	7940
E1	1	-573	-558	3509	6586
E2	1	33	-232	4374	7743
E3	1	-448	-464	3857	7073
E4	1	5011	2560	5907	8004
E5	1	5417	2836	6548	8720
E6	1	5205	2700	6293	8433
E7	1	330	-51	4642	7987
E8	1	956	351	4920	8177
E9	1	-196	-243	4427	7809
E10	1	4576	2350	5877	8085
E11	1	4183	2051	5699	7935
E12	1	4250	2205	5923	8259
F1	1	-1284	-1054	-1308	-1105
F2	1	-1478	-1151	-1451	-1259
F3	1	-1443	-1101	-1343	-1129
F4	1	-896	-810	-1127	-949
F5	1	-945	-877	-1140	-970
F6	1	-761	-820	-1144	-988
F7	1	-965	-904	-1192	-1018
F8	1	-987	-903	-1156	-984
F9	1	-1667	-1224	-1441	-1154
F10	1	-1617	-1300	-1592	-1340
F11	1	-2302	-1563	-1791	-1478
F12	1	-1928	-1371	-1639	-1362
G1	1	-2148	-1535	-1733	-1445
G2	1	-2438	-1672	-1847	-1544
G3	1	-3263	-2165	-2293	-1902
G4	1	-2312	-1628	-1757	-1444
G5	1	-2020	-1541	-1724	-1445
G6	1	-1347	-924	-763	-179
G7	1	-2466	-1813	-1982	-1615
G8	1	-1626	-1353	-1489	-1105
G9	1	-970	-806	-847	-569
G10	1	-3057	-1994	-2118	-1696
G11	1	-3803	-2462	-2645	-2150
G12	1	-2576	-1708	-1860	-1479
H1	1	-1423	-1073	-1220	-920
H2	1	-2421	-1668	-1807	-1488
H3	1	-2239	-1542	-1671	-1379
H4	1	-2304	-1583	-1708	-1084
H5	1	-804	-866	-1089	-899
H6	1	-1313	-1126	-1282	-1010
H7	1	21729	15335	19055	19011
H8	1	-2121	-1539	-1633	-1025
H9	1	-2194	-1498	-1576	-1191
H10	1	-2928	-1953	-2081	-1656
H11	1	-2321	-1566	-1677	-1304
H12	1	-3178	-2053	-2150	-1708
A1	2	437	-13	3925	6839
A2	2	1748	602	4875	7950
A3	2	0	-300	4104	7374
A4	2	4437	2200	5457	7456
A5	2	4420	2268	5735	7932
A6	2	4735	2439	6187	8492
A7	2	-70	-315	4235	8476
A8	2	634	747	5707	8923
A9	2	-497	-420	3997	7225
A10	2	2326	1152	4078	6103
A11	2	2983	1454	4316	6278
A12	2	2543	1287	4135	6082
B1	2	452	13	4018	6996
B2	2	-613	-623	3566	6742
B3	2	-446	-444	3698	6765
B4	2	4362	2198	5723	7891
B5	2	4803	2455	6183	8458
B6	2	4737	2434	6317	8614
B7	2	-570	-527	3661	6742
B8	2	1381	781	5676	8942
B9	2	-72	24	4397	7412
B10	2	4364	2187	5884	8244
B11	2	3874	1884	4987	6922
B12	2	4707	2411	5887	8038
C1	2	-124	-363	3525	6410
C2	2	316	-126	3605	6351
C3	2	-1003	-731	3002	5838
C4	2	5142	2676	6248	8352
C5	2	4952	2506	6080	8287
C6	2	5124	2666	6267	8391
C7	2	-892	-746	3479	6599
C8	2	83	-203	4224	7456
C9	2	-852	-655	3461	6492
C10	2	4620	2417	5915	8024
C11	2	4244	2113	5320	7276
C12	2	3704	1866	5148	7242
D1	2	267	-60	3972	6983
D2	2	696	263	4496	7522
D3	2	-388	-401	3887	7058
D4	2	4400	2241	5649	7827
D5	2	5017	2561	6121	8301
D6	2	5229	2713	6186	8184
D7	2	36	-179	4079	7119
D8	2	82	-162	4165	7236
D9	2	-534	-464	4121	7413
D10	2	4569	2393	5981	8164
D11	2	4334	2229	5898	8220
D12	2	3225	1611	5314	7719
E1	2	-601	-550	3514	6577
E2	2	-95	-274	4267	7618
E3	2	-543	-527	3776	6962
E4	2	5012	2574	5947	8076
E5	2	5219	2751	6408	8586
E6	2	5151	2648	6256	8415
E7	2	212	-120	4521	7854
E8	2	854	284	4826	8067
E9	2	-256	-286	4384	7763
E10	2	4298	2196	5678	7864
E11	2	3744	1823	5366	7588
E12	2	3996	2059	5715	8055
F1	2	-1344	-1064	-1314	-1128
F2	2	-1625	-1224	-1496	-1301
F3	2	-1545	-1158	-1382	-1160
F4	2	-1005	-873	-1179	-998
F5	2	-1046	-945	-1187	-1010
F6	2	-846	-877	-1173	-1010
F7	2	-1139	-986	-1269	-1069
F8	2	-1118	-969	-1215	-1021
F9	2	-1783	-1288	-1491	-1191
F10	2	-1856	-1400	-1659	-1406
F11	2	-2491	-1659	-1854	-1524
F12	2	-2056	-1423	-1674	-1411
G1	2	-2147	-1528	-1703	-1448
G2	2	-2435	-1651	-1835	-1529
G3	2	-3256	-2162	-2312	-1899
G4	2	-2299	-1609	-1747	-1446
G5	2	-1973	-1516	-1700	-1435
G6	2	-1346	-935	-769	-194
G7	2	-2471	-1813	-1986	-1634
G8	2	-1653	-1387	-1518	-1139
G9	2	-1010	-824	-866	-582
G10	2	-3143	-2051	-2159	-1716
G11	2	-3829	-2480	-2633	-2142
G12	2	-2645	-1744	-1876	-1504
H1	2	-1439	-1083	-1219	-916
H2	2	-2455	-1685	-1825	-1485
H3	2	-2258	-1576	-1695	-1371
H4	2	-2350	-1614	-1726	-1093
H5	2	-813	-874	-1104	-908
H6	2	-1319	-1128	-1280	-1013
H7	2	21580	15229	18961	18935
H8	2	-2219	-1595	-1660	-1066
H9	2	-2256	-1530	-1577	-1214
H10	2	-3011	-2001	-2117	-1675
H11	2	-2386	-1606	-1711	-1338
H12	2	-3256	-2087	-2190	-1723
A1	3	320	-92	3840	6745
A2	3	1604	508	4774	7862
A3	3	-168	-384	3951	7190
A4	3	4276	2118	5349	7328
A5	3	4290	2200	5613	7793
A6	3	4718	2424	6175	8487
A7	3	-151	-347	4207	8463
A8	3	537	717	5627	8823
A9	3	-550	-434	3967	7208
A10	3	1806	852	3637	5601
A11	3	2421	1132	3852	5768
A12	3	2051	1008	3721	5613
B1	3	291	-70	3845	6756
B2	3	-774	-700	3419	6568
B3	3	-582	-513	3552	6576
B4	3	4183	2103	5617	7795
B5	3	4581	2318	5966	8209
B6	3	4596	2379	6226	8547
B7	3	-718	-598	3472	6520
B8	3	1124	634	5453	8714
B9	3	-311	-116	4153	7099
B10	3	3957	1972	5590	7948
B11	3	3529	1711	4774	6724
B12	3	4046	2062	5337	7433
C1	3	-302	-462	3316	6134
C2	3	24	-292	3283	5965
C3	3	-1265	-901	2718	5474
C4	3	5104	2636	6210	8317
C5	3	4990	2524	6169	8374
C6	3	5069	2645	6258	8378
C7	3	-988	-784	3413	6509
C8	3	-80	-282	4122	7352
C9	3	-1039	-761	3294	6296
C10	3	4475	2330	5795	7925
C11	3	3777	1869	4962	6891
C12	3	3356	1690	4888	6975
D1	3	119	-147	3824	6774
D2	3	459	133	4303	7273
D3	3	-426	-415	3895	7079
D4	3	4277	2167	5573	7736
D5	3	4974	2550	6139	8293
D6	3	5158	2674	6131	8160
D7	3	-50	-232	3989	7032
D8	3	35	-181	4118	7219
D9	3	-593	-499	4059	7361
D10	3	4174	2190	5680	7857
D11	3	4108	2095	5732	8050
D12	3	2837	1399	4990	7376
E1	3	-653	-603	3447	6520
E2	3	-161	-325	4219	7582
E3	3	-593	-544	3741	6924
E4	3	4861	2492	5842	7953
E5	3	5150	2696	6381	8544
E6	3	5079	2616	6213	8406
E7	3	109	-183	4419	7742
E8	3	774	239	4765	7991
E9	3	-366	-340	4320	7718
E10	3	3963	2010	5451	7643
E11	3	3053	1472	4848	7006
E12	3	3555	1804	5345	7633
F1	3	-1403	-1109	-1359	-1146
F2	3	-1739	-1309	-1549	-1339
F3	3	-1616	-1180	-1393	-1165
F4	3	-1088	-919	-1213	-1026
F5	3	-1142	-993	-1223	-1026
F6	3	-913	-906	-1192	-1029
F7	3	-1243	-1042	-1297	-1108
F8	3	-1233	-1018	-1262	-1051
F9	3	-1913	-1356	-1535	-1231
F10	3	-2037	-1497	-1744	-1421
F11	3	-2643	-1747	-1905	-1578
F12	3	-2180	-1502	-1738	-1455
G1	3	-2154	-1527	-1718	-1444
G2	3	-2435	-1661	-1830	-1534
G3	3	-3307	-2195	-2328	-1920
G4	3	-2281	-1600	-1749	-1434
G5	3	-1981	-1523	-1713	-1442
G6	3	-1392	-957	-791	-210
G7	3	-2486	-1821	-1981	-1624
G8	3	-1706	-1419	-1540	-1152
G9	3	-1087	-856	-900	-625
G10	3	-3224	-2107	-2197	-1721
G11	3	-3877	-2492	-2650	-2161
G12	3	-2746	-1783	-1917	-1536
H1	3	-1473	-1100	-1232	-941
H2	3	-2493	-1703	-1834	-1492
H3	3	-2286	-1571	-1690	-1369
H4	3	-2418	-1648	-1765	-1113
H5	3	-880	-924	-1117	-940
H6	3	-1366	-1162	-1313	-1021
H7	3	21426	15101	18819	18838
H8	3	-2425	-1691	-1741	-1118
H9	3	-2353	-1594	-1649	-1237
H10	3	-3097	-2038	-2145	-1718
H11	3	-2483	-1669	-1740	-1352
H12	3	-3386	-2145	-2243	-1760
A1	4	263	-109	3803	6726
A2	4	1442	460	4625	7690
A3	4	-292	-458	3829	7024
A4	4	4067	1984	5159	7150
A5	4	4252	2154	5578	7761
A6	4	4699	2426	6181	8500
A7	4	-190	-359	4199	8498
A8	4	439	628	5491	8665
A9	4	-591	-450	3929	7151
A10	4	1587	739	3453	5425
A11	4	2238	1031	3742	5616
A12	4	1906	913	3598	5492
B1	4	193	-131	3728	6593
B2	4	-876	-741	3311	6448
B3	4	-647	-545	3505	6522
B4	4	3996	1990	5460	7621
B5	4	4513	2289	5946	8184
B6	4	4470	2302	6143	8448
B7	4	-804	-648	3404	6427
B8	4	899	517	5213	8479
B9	4	-402	-162	4037	6952
B10	4	3732	1865	5411	7772
B11	4	3350	1618	4659	6611
B12	4	3909	1975	5226	7318
C1	4	-371	-495	3245	6049
C2	4	-157	-384	3126	5757
C3	4	-1393	-973	2541	5243
C4	4	5065	2636	6208	8349
C5	4	4899	2465	6060	8279
C6	4	5037	2636	6240	8370
C7	4	-1042	-827	3375	6490
C8	4	-182	-347	4023	7213
C9	4	-1171	-829	3122	6080
C10	4	4321	2247	5693	7810
C11	4	3495	1721	4764	6675
C12	4	3178	1607	4750	6827
D1	4	30	-183	3708	6648
D2	4	330	72	4166	7118
D3	4	-481	-464	3835	7008
D4	4	4275	2182	5594	7777
D5	4	4929	2517	6116	8306
D6	4	5090	2646	6119	8146
D7	4	-121	-261	3926	6960
D8	4	4	-200	4087	7179
D9	4	-680	-563	3968	7264
D10	4	3889	2022	5456	7628
D11	4	3805	1924	5477	7780
D12	4	2576	1246	4757	7135
E1	4	-715	-616	3389	6418
E2	4	-197	-343	4212	7586
E3	4	-655	-602	3695	6889
E4	4	4919	2515	5906	8045
E5	4	5116	2667	6358	8540
E6	4	5026	2600	6219	8408
E7	4	-24	-258	4338	7637
E8	4	667	168	4668	7874
E9	4	-480	-419	4201	7558
E10	4	3776	1916	5325	7521
E11	4	2787	1319	4606	6750
E12	4	3275	1658	5109	7385
F1	4	-1473	-1151	-1373	-1170
F2	4	-1815	-1332	-1574	-1347
F3	4	-1629	-1196	-1415	-1187
F4	4	-1134	-948	-1232	-1025
F5	4	-1175	-1012	-1252	-1029
F6	4	-937	-918	-1201	-1036
F7	4	-1331	-1079	-1337	-1126
F8	4	-1350	-1093	-1323	-1095
F9	4	-2018	-1409	-1573	-1258
F10	4	-2168	-1556	-1773	-1456
F11	4	-2728	-1770	-1945	-1594
F12	4	-2275	-1531	-1763	-1459
G1	4	-2175	-1550	-1728	-1452
G2	4	-2448	-1675	-1851	-1541
G3	4	-3281	-2170	-2325	-1904
G4	4	-2309	-1610	-1758	-1446
G5	4	-1988	-1518	-1710	-1448
G6	4	-1431	-974	-830	-242
G7	4	-2530	-1832	-1994	-1639
G8	4	-1795	-1467	-1572	-1180
G9	4	-1110	-880	-907	-622
G10	4	-3273	-2118	-2213	-1759
G11	4	-3908	-2520	-2661	-2163
G12	4	-2820	-1840	-1953	-1550
H1	4	-1499	-1112	-1243	-919
H2	4	-2524	-1717	-1839	-1506
H3	4	-2308	-1576	-1694	-1396
H4	4	-2463	-1670	-1781	-1152
H5	4	-916	-930	-1140	-922
H6	4	-1382	-1166	-1313	-1045
H7	4	21297	15019	18720	18776
H8	4	-2491	-1734	-1764	-1122
H9	4	-2408	-1618	-1670	-1265
H10	4	-3137	-2062	-2152	-1716
H11	4	-2547	-1685	-1783	-1371
H12	4	-3417	-2168	-2270	-1776
A1	5	198	-147	3733	6644
A2	5	1341	382	4540	7571
A3	5	-384	-501	3753	6958
A4	5	3962	1952	5072	7058
A5	5	4170	2103	5515	7693
A6	5	4651	2395	6145	8459
A7	5	-235	-375	4208	8511
A8	5	396	592	5438	8612
A9	5	-622	-464	3909	7134
A10	5	1462	671	3340	5315
A11	5	2110	958	3625	5517
A12	5	1770	846	3501	5394
B1	5	135	-148	3678	6546
B2	5	-969	-797	3213	6327
B3	5	-729	-593	3404	6410
B4	5	3831	1899	5333	7503
B5	5	4377	2223	5837	8067
B6	5	4418	2269	6102	8428
B7	5	-819	-655	3380	6422
B8	5	821	457	5146	8392
B9	5	-445	-213	3983	6890
B10	5	3578	1765	5296	7637
B11	5	3239	1571	4589	6544
B12	5	3788	1903	5119	7227
C1	5	-441	-545	3158	5949
C2	5	-255	-444	3003	5608
C3	5	-1457	-998	2485	5193
C4	5	5026	2605	6213	8351
C5	5	4906	2469	6088	8314
C6	5	5038	2634	6238	8378
C7	5	-1096	-847	3340	6428
C8	5	-262	-383	3962	7148
C9	5	-1237	-864	3030	5989
C10	5	4180	2167	5582	7724
C11	5	3341	1665	4662	6585
C12	5	3094	1560	4707	6774
D1	5	-40	-232	3632	6512
D2	5	253	13	4062	6986
D3	5	-502	-467	3862	7034
D4	5	4253	2167	5586	7771
D5	5	4906	2511	6113	8298
D6	5	5025	2601	6053	8101
D7	5	-169	-309	3852	6865
D8	5	-11	-210	4088	7178
D9	5	-728	-569	3914	7199
D10	5	3753	1942	5357	7524
D11	5	3619	1815	5346	7641
D12	5	2346	1126	4583	6910
E1	5	-760	-650	3348	6362
E2	5	-215	-369	4193	7557
E3	5	-683	-587	3652	6847
E4	5	4919	2523	5931	8067
E5	5	5036	2642	6304	8486
E6	5	4945	2547	6158	8329
E7	5	-95	-289	4265	7559
E8	5	582	128	4589	7766
E9	5	-582	-465	4142	7465
E10	5	3664	1857	5251	7438
E11	5	2605	1231	4472	6634
E12	5	3048	1521	4910	7199
F1	5	-1495	-1161	-1391	-1184
F2	5	-1890	-1369	-1594	-1375
F3	5	-1682	-1231	-1429	-1195
F4	5	-1154	-956	-1239	-1034
F5	5	-1226	-1036	-1269	-1068
F6	5	-989	-949	-1233	-1037
F7	5	-1406	-1129	-1373	-1137
F8	5	-1419	-1115	-1341	-1090
F9	5	-2094	-1438	-1608	-1284
F10	5	-2226	-1583	-1802	-1486
F11	5	-2803	-1816	-1969	-1587
F12	5	-2354	-1577	-1793	-1478
G1	5	-2173	-1540	-1725	-1452
G2	5	-2474	-1681	-1848	-1541
G3	5	-3289	-2182	-2326	-1904
G4	5	-2300	-1605	-1750	-1451
G5	5	-1978	-1519	-1724	-1440
G6	5	-1468	-997	-846	-257
G7	5	-2549	-1854	-2024	-1645
G8	5	-1836	-1482	-1578	-1187
G9	5	-1127	-892	-933	-638
G10	5	-3299	-2133	-2235	-1763
G11	5	-3940	-2538	-2693	-2167
G12	5	-2849	-1847	-1971	-1568
H1	5	-1525	-1112	-1257	-928
H2	5	-2547	-1718	-1875	-1514
H3	5	-2327	-1597	-1703	-1386
H4	5	-2477	-1697	-1793	-1159
H5	5	-940	-946	-1162	-944
H6	5	-1395	-1170	-1314	-1021
H7	5	21186	14948	18657	18686
H8	5	-2518	-1737	-1775	-1148
H9	5	-2453	-1637	-1685	-1271
H10	5	-3149	-2067	-2170	-1720
H11	5	-2579	-1698	-1787	-1372
H12	5	-3452	-2174	-2260	-1791
A1	6	149	-181	3703	6595
A2	6	1235	334	4456	7460
A3	6	-451	-546	3688	6857
A4	6	3843	1862	4986	6955
A5	6	4117	2076	5464	7633
A6	6	4651	2393	6135	8463
A7	6	-245	-383	4194	8478
A8	6	325	575	5353	8521
A9	6	-647	-472	3878	7089
A10	6	1329	577	3237	5191
A11	6	1971	902	3535	5433
A12	6	1633	777	3418	5324
B1	6	58	-182	3598	6418
B2	6	-1023	-836	3139	6213
B3	6	-757	-614	3384	6369
B4	6	3712	1843	5245	7415
B5	6	4273	2157	5737	7966
B6	6	4352	2236	6057	8382
B7	6	-849	-675	3367	6392
B8	6	735	397	5059	8315
B9	6	-509	-246	3927	6816
B10	6	3470	1716	5219	7559
B11	6	3115	1495	4496	6469
B12	6	3686	1875	5058	7141
C1	6	-465	-545	3129	5903
C2	6	-338	-494	2897	5491
C3	6	-1550	-1065	2404	5085
C4	6	5015	2592	6205	8372
C5	6	4918	2491	6110	8346
C6	6	5003	2616	6220	8361
C7	6	-1130	-885	3318	6408
C8	6	-326	-435	3893	7082
C9	6	-1308	-918	2962	5904
C10	6	4100	2121	5527	7648
C11	6	3247	1605	4603	6531
C12	6	3025	1528	4663	6732
D1	6	-88	-249	3583	6470
D2	6	223	-7	4056	7004
D3	6	-545	-494	3787	6961
D4	6	4232	2154	5595	7771
D5	6	4848	2474	6049	8239
D6	6	4964	2570	6039	8081
D7	6	-219	-330	3797	6808
D8	6	-47	-233	4034	7133
D9	6	-800	-629	3839	7081
D10	6	3611	1891	5269	7428
D11	6	3480	1747	5250	7557
D12	6	2222	1041	4464	6798
E1	6	-797	-658	3319	6315
E2	6	-224	-337	4235	7606
E3	6	-726	-639	3635	6812
E4	6	4903	2515	5921	8057
E5	6	4984	2603	6275	8425
E6	6	4948	2536	6168	8375
E7	6	-150	-322	4210	7512
E8	6	516	87	4505	7681
E9	6	-656	-508	4032	7350
E10	6	3490	1756	5120	7309
E11	6	2440	1124	4357	6516
E12	6	2900	1446	4787	7068
F1	6	-1565	-1190	-1404	-1190
F2	6	-1934	-1409	-1627	-1388
F3	6	-1710	-1249	-1438	-1206
F4	6	-1184	-973	-1258	-1037
F5	6	-1273	-1065	-1287	-1069
F6	6	-1027	-979	-1244	-1071
F7	6	-1468	-1158	-1393	-1154
F8	6	-1460	-1146	-1354	-1129
F9	6	-2177	-1488	-1662	-1311
F10	6	-2333	-1625	-1839	-1506
F11	6	-2840	-1848	-1991	-1629
F12	6	-2418	-1620	-1842	-1507
G1	6	-2196	-1554	-1738	-1465
G2	6	-2485	-1690	-1854	-1542
G3	6	-3310	-2188	-2333	-1918
G4	6	-2317	-1629	-1755	-1456
G5	6	-1990	-1525	-1740	-1448
G6	6	-1487	-1016	-869	-277
G7	6	-2577	-1866	-2021	-1650
G8	6	-1879	-1508	-1607	-1192
G9	6	-1162	-902	-952	-647
G10	6	-3349	-2161	-2230	-1770
G11	6	-3962	-2549	-2696	-2195
G12	6	-2893	-1870	-1978	-1576
H1	6	-1555	-1136	-1264	-939
H2	6	-2565	-1755	-1878	-1525
H3	6	-2336	-1598	-1719	-1385
H4	6	-2518	-1706	-1813	-1171
H5	6	-958	-961	-1154	-956
H6	6	-1413	-1181	-1329	-1040
H7	6	21085	14875	18555	18614
H8	6	-2552	-1761	-1780	-1149
H9	6	-2478	-1665	-1698	-1287
H10	6	-3184	-2095	-2182	-1751
H11	6	-2614	-1726	-1802	-1397
H12	6	-3488	-2202	-2272	-1801
A1	7	93	-215	3657	6533
A2	7	1179	307	4412	7425
A3	7	-515	-569	3633	6771
A4	7	3745	1818	4904	6873
A5	7	4060	2039	5441	7622
A6	7	4618	2365	6104	8417
A7	7	-280	-425	4170	8471
A8	7	282	538	5284	8436
A9	7	-671	-495	3862	7049
A10	7	1250	537	3174	5122
A11	7	1872	842	3474	5345
A12	7	1569	726	3358	5250
B1	7	30	-220	3584	6417
B2	7	-1100	-898	3035	6112
B3	7	-812	-647	3330	6309
B4	7	3642	1794	5209	7390
B5	7	4285	2163	5789	8043
B6	7	4285	2205	5998	8335
B7	7	-882	-691	3311	6341
B8	7	652	355	4965	8211
B9	7	-535	-262	3894	6784
B10	7	3386	1677	5164	7512
B11	7	3022	1451	4430	6394
B12	7	3612	1817	5008	7103
C1	7	-468	-551	3128	5921
C2	7	-407	-525	2839	5416
C3	7	-1619	-1096	2337	5000
C4	7	4998	2584	6188	8357
C5	7	4742	2383	5927	8155
C6	7	4944	2594	6191	8331
C7	7	-1139	-880	3295	6412
C8	7	-388	-450	3834	7007
C9	7	-1376	-945	2903	5814
C10	7	4043	2083	5481	7627
C11	7	3150	1552	4555	6466
C12	7	2969	1469	4607	6690
D1	7	-130	-284	3520	6385
D2	7	77	-99	3891	6799
D3	7	-553	-500	3787	6959
D4	7	4200	2116	5586	7764
D5	7	4843	2473	6077	8286
D6	7	4917	2558	6006	8053
D7	7	-238	-348	3799	6783
D8	7	-69	-235	4044	7123
D9	7	-850	-658	3741	6991
D10	7	3502	1804	5170	7326
D11	7	3353	1687	5152	7424
D12	7	2114	996	4393	6715
E1	7	-820	-688	3267	6290
E2	7	-315	-403	4102	7440
E3	7	-763	-640	3596	6776
E4	7	4823	2446	5850	7997
E5	7	4971	2594	6265	8464
E6	7	4893	2528	6140	8345
E7	7	-199	-343	4187	7474
E8	7	487	61	4463	7625
E9	7	-749	-563	3930	7214
E10	7	3379	1696	5057	7241
E11	7	2299	1047	4239	6353
E12	7	2753	1363	4688	6939
F1	7	-1603	-1208	-1433	-1204
F2	7	-2002	-1438	-1643	-1408
F3	7	-1723	-1251	-1452	-1219
F4	7	-1236	-1006	-1282	-1070
F5	7	-1285	-1057	-1291	-1081
F6	7	-1087	-987	-1266	-1062
F7	7	-1501	-1198	-1417	-1168
F8	7	-1498	-1172	-1389	-1126
F9	7	-2242	-1514	-1672	-1339
F10	7	-2375	-1657	-1866	-1524
F11	7	-2912	-1882	-2024	-1644
F12	7	-2448	-1632	-1851	-1511
G1	7	-2199	-1559	-1749	-1457
G2	7	-2488	-1694	-1875	-1555
G3	7	-3295	-2194	-2341	-1913
G4	7	-2327	-1645	-1766	-1470
G5	7	-2000	-1528	-1731	-1444
G6	7	-1517	-1031	-888	-294
G7	7	-2576	-1877	-2028	-1660
G8	7	-1925	-1526	-1623	-1220
G9	7	-1192	-928	-972	-660
G10	7	-3370	-2159	-2250	-1778
G11	7	-3972	-2547	-2689	-2191
G12	7	-2924	-1877	-1989	-1589
H1	7	-1537	-1145	-1265	-936
H2	7	-2590	-1755	-1903	-1539
H3	7	-2340	-1616	-1733	-1394
H4	7	-2510	-1710	-1811	-1164
H5	7	-976	-965	-1172	-957
H6	7	-1425	-1187	-1322	-1038
H7	7	21007	14824	18518	18574
H8	7	-2562	-1778	-1787	-1157
H9	7	-2507	-1682	-1720	-1305
H10	7	-3192	-2089	-2190	-1744
H11	7	-2634	-1725	-1830	-1412
H12	7	-3500	-2231	-2284	-1798
A1	8	48	-233	3616	6483
A2	8	1093	271	4336	7327
A3	8	-560	-592	3570	6723
A4	8	3646	1764	4851	6799
A5	8	3975	2001	5375	7543
A6	8	4553	2335	6050	8378
A7	8	-295	-431	4168	8462
A8	8	231	498	5204	8355
A9	8	-696	-489	3844	7042
A10	8	1164	488	3119	5044
A11	8	1784	796	3397	5271
A12	8	1507	707	3339	5216
B1	8	-6	-228	3535	6369
B2	8	-1162	-900	3003	6052
B3	8	-847	-656	3299	6264
B4	8	3609	1800	5214	7421
B5	8	4202	2128	5708	7960
B6	8	4257	2182	6006	8340
B7	8	-898	-697	3312	6330
B8	8	617	316	4929	8150
B9	8	-575	-289	3833	6707
B10	8	3318	1629	5100	7458
B11	8	2951	1412	4392	6362
B12	8	3490	1763	4944	7048
C1	8	-499	-553	3109	5885
C2	8	-464	-562	2794	5347
C3	8	-1655	-1146	2294	4937
C4	8	4976	2565	6198	8357
C5	8	4792	2406	5979	8206
C6	8	4913	2565	6160	8302
C7	8	-1223	-905	3247	6339
C8	8	-425	-490	3794	6948
C9	8	-1388	-972	2868	5798
C10	8	3949	2028	5429	7564
C11	8	3060	1510	4462	6401
C12	8	2929	1467	4591	6666
D1	8	-185	-306	3488	6329
D2	8	25	-120	3853	6755
D3	8	-546	-480	3799	6984
D4	8	4147	2093	5515	7714
D5	8	4800	2427	6043	8235
D6	8	4904	2538	5985	8048
D7	8	-296	-389	3730	6724
D8	8	-89	-254	4009	7091
D9	8	-879	-686	3726	6966
D10	8	3391	1742	5069	7237
D11	8	3255	1624	5072	7366
D12	8	1986	924	4276	6608
E1	8	-854	-701	3253	6226
E2	8	-300	-398	4125	7470
E3	8	-766	-656	3570	6754
E4	8	4763	2438	5837	7962
E5	8	4977	2591	6291	8508
E6	8	4864	2498	6106	8317
E7	8	-266	-359	4137	7435
E8	8	447	50	4434	7585
E9	8	-808	-587	3866	7152
E10	8	3286	1630	4983	7149
E11	8	2204	999	4179	6320
E12	8	2593	1290	4547	6787
F1	8	-1640	-1236	-1438	-1213
F2	8	-2057	-1477	-1691	-1427
F3	8	-1776	-1271	-1457	-1225
F4	8	-1240	-1005	-1280	-1064
F5	8	-1307	-1077	-1307	-1091
F6	8	-1101	-1014	-1278	-1080
F7	8	-1571	-1213	-1451	-1193
F8	8	-1560	-1197	-1426	-1162
F9	8	-2285	-1544	-1686	-1332
F10	8	-2423	-1675	-1886	-1531
F11	8	-2947	-1898	-2038	-1657
F12	8	-2500	-1663	-1869	-1524
G1	8	-2192	-1566	-1750	-1467
G2	8	-2489	-1698	-1877	-1563
G3	8	-3319	-2205	-2334	-1917
G4	8	-2318	-1635	-1760	-1463
G5	8	-2030	-1536	-1735	-1446
G6	8	-1540	-1045	-900	-294
G7	8	-2599	-1882	-2032	-1670
G8	8	-1941	-1543	-1632	-1222
G9	8	-1194	-941	-976	-674
G10	8	-3393	-2191	-2249	-1784
G11	8	-3990	-2561	-2698	-2199
G12	8	-2948	-1899	-2020	-1594
H1	8	-1561	-1154	-1271	-946
H2	8	-2604	-1750	-1884	-1532
H3	8	-2368	-1621	-1732	-1402
H4	8	-2532	-1717	-1817	-1162
H5	8	-983	-972	-1163	-973
H6	8	-1437	-1191	-1339	-1056
H7	8	20961	14790	18481	18543
H8	8	-2579	-1783	-1791	-1174
H9	8	-2532	-1681	-1725	-1303
H10	8	-3211	-2104	-2193	-1741
H11	8	-2645	-1741	-1827	-1415
H12	8	-3505	-2226	-2295	-1813
A1	9	-6	-259	3580	6423
A2	9	1040	232	4266	7237
A3	9	-619	-637	3518	6658
A4	9	3595	1719	4793	6766
A5	9	3934	1971	5317	7467
A6	9	4533	2331	6050	8372
A7	9	-304	-421	4149	8455
A8	9	196	450	5156	8264
A9	9	-722	-523	3813	7000
A10	9	1091	452	3066	5009
A11	9	1723	764	3377	5251
A12	9	1456	686	3292	5199
B1	9	-79	-277	3428	6218
B2	9	-1172	-928	2961	6010
B3	9	-892	-684	3258	6229
B4	9	3568	1753	5160	7350
B5	9	4120	2059	5618	7857
B6	9	4206	2167	5960	8272
B7	9	-902	-720	3306	6327
B8	9	541	292	4868	8065
B9	9	-607	-302	3814	6701
B10	9	3276	1614	5080	7415
B11	9	2854	1367	4333	6293
B12	9	3453	1739	4896	6991
C1	9	-550	-598	3037	5808
C2	9	-517	-586	2741	5283
C3	9	-1716	-1149	2221	4854
C4	9	5009	2600	6236	8424
C5	9	4815	2406	5998	8258
C6	9	4880	2546	6132	8277
C7	9	-1226	-922	3217	6311
C8	9	-487	-522	3723	6898
C9	9	-1443	-984	2831	5756
C10	9	3915	2019	5414	7536
C11	9	3019	1482	4454	6382
C12	9	2880	1427	4552	6620
D1	9	-229	-331	3425	6274
D2	9	8	-129	3844	6755
D3	9	-563	-514	3769	6960
D4	9	4194	2128	5559	7790
D5	9	4803	2461	6071	8251
D6	9	4851	2499	5966	8013
D7	9	-332	-402	3684	6666
D8	9	-102	-275	3986	7061
D9	9	-913	-695	3686	6908
D10	9	3262	1680	4972	7100
D11	9	3195	1591	5035	7321
D12	9	1884	868	4205	6508
E1	9	-866	-711	3222	6215
E2	9	-331	-394	4127	7496
E3	9	-818	-673	3546	6713
E4	9	4754	2415	5813	7945
E5	9	4892	2555	6210	8386
E6	9	4809	2475	6070	8290
E7	9	-291	-388	4139	7418
E8	9	428	20	4404	7567
E9	9	-847	-623	3828	7104
E10	9	3202	1601	4928	7106
E11	9	2162	981	4158	6291
E12	9	2470	1207	4466	6703
F1	9	-1671	-1260	-1462	-1232
F2	9	-2082	-1493	-1694	-1434
F3	9	-1822	-1298	-1479	-1232
F4	9	-1271	-1012	-1291	-1076
F5	9	-1350	-1110	-1333	-1100
F6	9	-1143	-1043	-1298	-1093
F7	9	-1594	-1238	-1462	-1186
F8	9	-1609	-1228	-1436	-1172
F9	9	-2330	-1579	-1719	-1352
F10	9	-2460	-1708	-1907	-1553
F11	9	-2989	-1919	-2064	-1661
F12	9	-2539	-1682	-1894	-1531
G1	9	-2196	-1572	-1746	-1450
G2	9	-2519	-1722	-1896	-1567
G3	9	-3332	-2203	-2357	-1925
G4	9	-2327	-1651	-1763	-1472
G5	9	-2024	-1553	-1737	-1466
G6	9	-1571	-1071	-926	-330
G7	9	-2614	-1880	-2030	-1676
G8	9	-1965	-1556	-1645	-1226
G9	9	-1233	-960	-987	-687
G10	9	-3404	-2204	-2257	-1799
G11	9	-3996	-2569	-2726	-2200
G12	9	-2985	-1916	-2028	-1597
H1	9	-1572	-1155	-1278	-967
H2	9	-2614	-1773	-1893	-1540
H3	9	-2378	-1634	-1751	-1419
H4	9	-2540	-1724	-1825	-1183
H5	9	-1014	-987	-1195	-979
H6	9	-1452	-1213	-1334	-1061
H7	9	20848	14705	18381	18459
H8	9	-2606	-1784	-1810	-1177
H9	9	-2548	-1696	-1739	-1316
H10	9	-3239	-2123	-2217	-1751
H11	9	-2674	-1754	-1837	-1413
H12	9	-3515	-2220	-2301	-1809
A1	10	-64	-291	3505	6342
A2	10	975	203	4205	7170
A3	10	-669	-653	3476	6589
A4	10	3530	1693	4745	6715
A5	10	3889	1937	5293	7455
A6	10	4496	2298	6022	8352
A7	10	-323	-441	4133	8414
A8	10	150	416	5086	8185
A9	10	-737	-540	3789	6972
A10	10	1041	415	3016	4955
A11	10	1625	686	3287	5154
A12	10	1423	660	3275	5182
B1	10	-49	-268	3476	6273
B2	10	-1230	-954	2921	5953
B3	10	-920	-691	3230	6194
B4	10	3537	1759	5170	7371
B5	10	4111	2071	5626	7858
B6	10	4187	2147	5943	8256
B7	10	-932	-731	3249	6264
B8	10	512	267	4809	7999
B9	10	-626	-322	3782	6669
B10	10	3207	1572	5022	7358
B11	10	2869	1368	4354	6329
B12	10	3386	1688	4839	6933
C1	10	-550	-586	3034	5774
C2	10	-524	-598	2726	5241
C3	10	-1763	-1184	2146	4792
C4	10	4981	2557	6202	8377
C5	10	4776	2383	5978	8212
C6	10	4892	2543	6148	8279
C7	10	-1247	-941	3209	6285
C8	10	-514	-517	3695	6859
C9	10	-1473	-1002	2811	5723
C10	10	3866	1987	5371	7506
C11	10	2951	1437	4435	6348
C12	10	2850	1414	4543	6620
D1	10	-274	-362	3375	6190
D2	10	-23	-154	3809	6696
D3	10	-603	-530	3736	6908
D4	10	4165	2096	5540	7763
D5	10	4743	2404	6000	8220
D6	10	4821	2502	5937	7995
D7	10	-330	-407	3676	6666
D8	10	-107	-277	3989	7061
D9	10	-921	-687	3663	6885
D10	10	3192	1617	4891	7036
D11	10	3083	1518	4933	7223
D12	10	1829	822	4167	6471
E1	10	-893	-735	3182	6152
E2	10	-376	-415	4091	7429
E3	10	-835	-679	3517	6671
E4	10	4664	2385	5729	7883
E5	10	4893	2548	6223	8442
E6	10	4780	2450	6046	8251
E7	10	-305	-405	4104	7403
E8	10	362	3	4360	7500
E9	10	-868	-640	3816	7069
E10	10	3135	1569	4885	7079
E11	10	2069	918	4086	6235
E12	10	2361	1142	4358	6595
F1	10	-1725	-1276	-1471	-1240
F2	10	-2148	-1511	-1712	-1452
F3	10	-1813	-1304	-1504	-1243
F4	10	-1297	-1034	-1308	-1098
F5	10	-1353	-1110	-1330	-1103
F6	10	-1188	-1064	-1318	-1092
F7	10	-1627	-1250	-1468	-1204
F8	10	-1647	-1245	-1445	-1182
F9	10	-2343	-1575	-1719	-1364
F10	10	-2507	-1720	-1922	-1553
F11	10	-3012	-1938	-2062	-1660
F12	10	-2593	-1702	-1894	-1547
G1	10	-2199	-1563	-1764	-1467
G2	10	-2516	-1722	-1885	-1568
G3	10	-3324	-2208	-2351	-1941
G4	10	-2329	-1641	-1771	-1474
G5	10	-2036	-1558	-1751	-1465
G6	10	-1571	-1078	-927	-336
G7	10	-2636	-1892	-2058	-1692
G8	10	-1988	-1567	-1651	-1250
G9	10	-1242	-967	-1005	-695
G10	10	-3406	-2200	-2264	-1796
G11	10	-4018	-2577	-2719	-2202
G12	10	-2985	-1928	-2021	-1610
H1	10	-1585	-1157	-1297	-960
H2	10	-2620	-1777	-1906	-1530
H3	10	-2395	-1626	-1749	-1418
H4	10	-2559	-1740	-1826	-1189
H5	10	-1023	-990	-1191	-972
H6	10	-1452	-1212	-1345	-1055
H7	10	20818	14700	18364	18467
H8	10	-2612	-1792	-1807	-1175
H9	10	-2559	-1707	-1746	-1316
H10	10	-3237	-2112	-2217	-1759
H11	10	-2672	-1764	-1848	-1429
H12	10	-3544	-2229	-2318	-1814
A1	11	-59	-292	3498	6341
A2	11	923	189	4161	7115
A3	11	-696	-662	3427	6537
A4	11	3474	1664	4720	6669
A5	11	3843	1926	5248	7399
A6	11	4471	2278	5993	8318
A7	11	-322	-439	4129	8417
A8	11	125	408	5038	8121
A9	11	-750	-531	3778	6963
A10	11	988	404	2980	4912
A11	11	1563	673	3255	5124
A12	11	1360	615	3224	5150
B1	11	-127	-294	3392	6162
B2	11	-1269	-970	2870	5895
B3	11	-926	-710	3190	6142
B4	11	3515	1730	5147	7341
B5	11	4063	2049	5601	7832
B6	11	4106	2114	5876	8183
B7	11	-929	-719	3257	6271
B8	11	466	233	4762	7953
B9	11	-674	-358	3722	6575
B10	11	3169	1537	4977	7302
B11	11	2788	1335	4268	6242
B12	11	3297	1641	4761	6854
C1	11	-541	-604	3036	5775
C2	11	-563	-606	2693	5234
C3	11	-1789	-1185	2114	4722
C4	11	5001	2595	6224	8413
C5	11	4752	2365	5978	8205
C6	11	4830	2506	6088	8238
C7	11	-1275	-944	3189	6273
C8	11	-543	-527	3684	6805
C9	11	-1502	-1031	2791	5689
C10	11	3837	1972	5355	7480
C11	11	2893	1421	4384	6302
C12	11	2796	1388	4519	6572
D1	11	-294	-368	3368	6217
D2	11	-85	-176	3747	6654
D3	11	-606	-523	3730	6892
D4	11	4217	2132	5619	7823
D5	11	4700	2397	5967	8183
D6	11	4761	2455	5904	7972
D7	11	-351	-418	3633	6611
D8	11	-124	-289	3962	7017
D9	11	-957	-724	3626	6831
D10	11	3103	1567	4820	6948
D11	11	3010	1482	4892	7166
D12	11	1774	800	4120	6432
E1	11	-914	-734	3185	6155
E2	11	-370	-422	4093	7420
E3	11	-859	-701	3478	6627
E4	11	4689	2389	5774	7920
E5	11	4854	2534	6205	8402
E6	11	4741	2437	6047	8233
E7	11	-340	-420	4072	7371
E8	11	338	-8	4334	7467
E9	11	-891	-649	3774	7017
E10	11	3097	1538	4848	7040
E11	11	2007	877	4047	6167
E12	11	2265	1092	4276	6478
F1	11	-1744	-1289	-1497	-1252
F2	11	-2165	-1524	-1734	-1460
F3	11	-1852	-1326	-1495	-1256
F4	11	-1314	-1035	-1299	-1095
F5	11	-1386	-1124	-1355	-1123
F6	11	-1209	-1067	-1321	-1114
F7	11	-1645	-1272	-1478	-1218
F8	11	-1675	-1281	-1468	-1195
F9	11	-2399	-1604	-1750	-1369
F10	11	-2526	-1757	-1936	-1566
F11	11	-3069	-1941	-2086	-1692
F12	11	-2597	-1722	-1906	-1569
G1	11	-2206	-1582	-1760	-1474
G2	11	-2525	-1720	-1884	-1567
G3	11	-3344	-2232	-2346	-1947
G4	11	-2337	-1656	-1778	-1479
G5	11	-2050	-1554	-1755	-1463
G6	11	-1606	-1098	-941	-341
G7	11	-2634	-1909	-2056	-1680
G8	11	-2001	-1583	-1660	-1260
G9	11	-1255	-965	-1011	-709
G10	11	-3430	-2207	-2279	-1786
G11	11	-4011	-2576	-2727	-2197
G12	11	-3014	-1926	-2050	-1607
H1	11	-1582	-1166	-1277	-957
H2	11	-2631	-1781	-1905	-1536
H3	11	-2403	-1634	-1740	-1418
H4	11	-2556	-1731	-1836	-1198
H5	11	-1023	-997	-1196	-983
H6	11	-1465	-1227	-1367	-1049
H7	11	20709	14606	18269	18379
H8	11	-2624	-1801	-1828	-1183
H9	11	-2567	-1725	-1753	-1316
H10	11	-3257	-2127	-2214	-1759
H11	11	-2677	-1761	-1839	-1436
H12	11	-3532	-2247	-2309	-1818
A1	12	-75	-316	3467	6306
A2	12	880	159	4128	7060
A3	12	-709	-677	3389	6515
A4	12	3420	1633	4666	6631
A5	12	3777	1881	5204	7328
A6	12	4432	2272	5981	8304
A7	12	-338	-449	4113	8389
A8	12	118	388	4989	8067
A9	12	-756	-551	3758	6916
A10	12	961	371	2951	4892
A11	12	1553	661	3230	5103
A12	12	1324	598	3200	5102
B1	12	-118	-290	3397	6184
B2	12	-1273	-969	2842	5868
B3	12	-947	-715	3172	6115
B4	12	3489	1717	5139	7335
B5	12	3989	1994	5525	7738
B6	12	4096	2094	5869	8190
B7	12	-907	-719	3244	6254
B8	12	463	221	4729	7905
B9	12	-657	-355	3717	6570
B10	12	3199	1541	4968	7286
B11	12	2791	1300	4245	6164
B12	12	3240	1620	4711	6760
C1	12	-539	-601	3028	5770
C2	12	-556	-608	2697	5238
C3	12	-1795	-1196	2123	4731
C4	12	4990	2571	6234	8391
C5	12	4779	2399	6009	8261
C6	12	4819	2497	6075	8227
C7	12	-1280	-956	3177	6243
C8	12	-543	-559	3665	6807
C9	12	-1514	-1027	2761	5671
C10	12	3820	1959	5344	7478
C11	12	2892	1416	4371	6288
C12	12	2779	1389	4478	6568
D1	12	-305	-385	3334	6170
D2	12	-152	-225	3672	6525
D3	12	-591	-537	3739	6901
D4	12	4217	2126	5610	7833
D5	12	4745	2409	6009	8241
D6	12	4716	2438	5876	7944
D7	12	-345	-418	3649	6600
D8	12	-121	-294	3943	7000
D9	12	-959	-722	3583	6801
D10	12	3050	1557	4769	6879
D11	12	2974	1472	4846	7108
D12	12	1741	787	4082	6366
E1	12	-911	-732	3192	6163
E2	12	-423	-469	3989	7287
E3	12	-872	-714	3461	6601
E4	12	4697	2383	5764	7934
E5	12	4833	2505	6163	8375
E6	12	4733	2403	6013	8213
E7	12	-350	-412	4078	7370
E8	12	322	-37	4304	7444
E9	12	-935	-648	3735	6985
E10	12	3032	1491	4797	6976
E11	12	1982	879	4029	6172
E12	12	2183	1047	4210	6412
F1	12	-1766	-1297	-1507	-1254
F2	12	-2232	-1556	-1747	-1478
F3	12	-1878	-1341	-1509	-1247
F4	12	-1329	-1041	-1331	-1097
F5	12	-1405	-1142	-1355	-1122
F6	12	-1221	-1092	-1326	-1123
F7	12	-1671	-1287	-1497	-1244
F8	12	-1723	-1286	-1480	-1198
F9	12	-2426	-1633	-1761	-1380
F10	12	-2572	-1759	-1944	-1574
F11	12	-3077	-1976	-2098	-1692
F12	12	-2680	-1750	-1940	-1584
G1	12	-2228	-1563	-1769	-1489
G2	12	-2538	-1739	-1891	-1591
G3	12	-3352	-2214	-2375	-1936
G4	12	-2336	-1645	-1772	-1478
G5	12	-2063	-1572	-1763	-1478
G6	12	-1628	-1099	-952	-364
G7	12	-2655	-1916	-2068	-1686
G8	12	-2015	-1574	-1673	-1257
G9	12	-1261	-954	-1009	-701
G10	12	-3444	-2206	-2293	-1800
G11	12	-4026	-2586	-2723	-2208
G12	12	-3031	-1958	-2050	-1629
H1	12	-1603	-1165	-1291	-964
H2	12	-2617	-1792	-1909	-1550
H3	12	-2395	-1651	-1764	-1429
H4	12	-2565	-1744	-1842	-1199
H5	12	-1031	-1011	-1195	-984
H6	12	-1463	-1219	-1357	-1070
H7	12	20675	14579	18238	18367
H8	12	-2630	-1807	-1814	-1190
H9	12	-2593	-1725	-1748	-1325
H10	12	-3246	-2131	-2222	-1757
H11	12	-2691	-1773	-1863	-1424
H12	12	-3547	-2240	-2314	-1827
A1	13	-73	-307	3485	6315
A2	13	862	154	4105	7025
A3	13	-741	-694	3360	6442
A4	13	3375	1612	4624	6596
A5	13	3773	1880	5196	7321
A6	13	4426	2258	5955	8269
A7	13	-306	-430	4128	8405
A8	13	112	376	4968	8040
A9	13	-762	-535	3735	6897
A10	13	995	374	2956	4884
A11	13	1515	636	3178	5034
A12	13	1313	586	3152	5085
B1	13	-159	-314	3342	6107
B2	13	-1293	-990	2827	5826
B3	13	-936	-723	3191	6103
B4	13	3457	1702	5101	7294
B5	13	4012	2003	5561	7755
B6	13	4069	2079	5840	8161
B7	13	-879	-704	3239	6250
B8	13	448	208	4709	7862
B9	13	-660	-337	3711	6553
B10	13	3295	1601	4967	7269
B11	13	2824	1312	4236	6161
B12	13	3243	1614	4657	6699
C1	13	-482	-576	3035	5777
C2	13	-556	-601	2688	5229
C3	13	-1827	-1219	2040	4633
C4	13	4979	2535	6186	8358
C5	13	4758	2365	5946	8206
C6	13	4832	2506	6107	8224
C7	13	-1268	-959	3156	6236
C8	13	-553	-556	3649	6784
C9	13	-1517	-1036	2744	5660
C10	13	3875	1969	5350	7480
C11	13	2867	1390	4330	6256
C12	13	2765	1370	4453	6516
D1	13	-324	-383	3316	6122
D2	13	-183	-274	3631	6480
D3	13	-597	-534	3710	6854
D4	13	4240	2146	5645	7863
D5	13	4701	2375	5985	8203
D6	13	4705	2430	5847	7890
D7	13	-329	-416	3651	6622
D8	13	-102	-272	3938	6997
D9	13	-946	-739	3596	6776
D10	13	3041	1548	4736	6835
D11	13	2924	1429	4773	7043
D12	13	1718	761	4043	6346
E1	13	-913	-731	3141	6114
E2	13	-439	-465	3942	7231
E3	13	-874	-731	3442	6573
E4	13	4711	2399	5780	7941
E5	13	4821	2493	6160	8380
E6	13	4687	2383	5985	8195
E7	13	-343	-428	4085	7344
E8	13	318	-44	4265	7403
E9	13	-929	-664	3724	6962
E10	13	3002	1485	4765	6931
E11	13	1926	849	3959	6105
E12	13	2141	1026	4184	6386
F1	13	-1818	-1321	-1529	-1266
F2	13	-2260	-1595	-1786	-1485
F3	13	-1872	-1328	-1534	-1259
F4	13	-1348	-1058	-1329	-1091
F5	13	-1446	-1151	-1366	-1125
F6	13	-1278	-1114	-1350	-1150
F7	13	-1710	-1302	-1498	-1244
F8	13	-1745	-1313	-1493	-1208
F9	13	-2461	-1648	-1764	-1378
F10	13	-2579	-1780	-1971	-1590
F11	13	-3112	-1999	-2104	-1713
F12	13	-2681	-1770	-1951	-1593
G1	13	-2239	-1574	-1768	-1481
G2	13	-2542	-1723	-1901	-1570
G3	13	-3367	-2231	-2378	-1932
G4	13	-2325	-1649	-1775	-1462
G5	13	-2048	-1565	-1755	-1469
G6	13	-1625	-1112	-972	-359
G7	13	-2668	-1925	-2073	-1697
G8	13	-2037	-1598	-1667	-1271
G9	13	-1271	-994	-1026	-719
G10	13	-3439	-2236	-2289	-1804
G11	13	-4041	-2600	-2735	-2221
G12	13	-3043	-1957	-2065	-1633
H1	13	-1620	-1181	-1290	-965
H2	13	-2645	-1792	-1926	-1556
H3	13	-2413	-1642	-1766	-1430
H4	13	-2566	-1746	-1852	-1207
H5	13	-1048	-1022	-1220	-997
H6	13	-1460	-1222	-1367	-1066
H7	13	20609	14545	18193	18309
H8	13	-2662	-1810	-1826	-1199
H9	13	-2590	-1729	-1759	-1336
H10	13	-3276	-2141	-2233	-1775
H11	13	-2688	-1775	-1852	-1428
H12	13	-3551	-2239	-2319	-1835
A1	14	-32	-285	3463	6275
A2	14	881	135	4063	6975
A3	14	-722	-680	3348	6448
A4	14	3359	1602	4606	6563
A5	14	3761	1860	5172	7291
A6	14	4438	2257	5956	8268
A7	14	-253	-410	4116	8389
A8	14	142	384	4937	7982
A9	14	-699	-512	3722	6863
A10	14	1033	396	2965	4886
A11	14	1530	671	3176	5032
A12	14	1318	606	3155	5054
B1	14	-142	-316	3323	6061
B2	14	-1287	-976	2797	5780
B3	14	-937	-715	3136	6070
B4	14	3444	1690	5074	7273
B5	14	3990	1999	5525	7729
B6	14	4048	2076	5825	8134
B7	14	-801	-680	3264	6238
B8	14	488	220	4686	7834
B9	14	-622	-322	3719	6546
B10	14	3476	1669	5011	7270
B11	14	2974	1387	4260	6164
B12	14	3335	1639	4635	6627
C1	14	-414	-545	3054	5768
C2	14	-519	-595	2674	5195
C3	14	-1794	-1207	2040	4618
C4	14	4989	2558	6182	8349
C5	14	4826	2415	5995	8238
C6	14	4894	2534	6097	8245
C7	14	-1226	-945	3157	6229
C8	14	-532	-546	3642	6758
C9	14	-1511	-1027	2734	5624
C10	14	3925	1992	5375	7486
C11	14	2884	1403	4329	6234
C12	14	2785	1384	4435	6484
D1	14	-319	-401	3299	6110
D2	14	-150	-230	3667	6519
D3	14	-590	-542	3691	6831
D4	14	4257	2154	5618	7855
D5	14	4694	2361	5941	8156
D6	14	4722	2420	5862	7932
D7	14	-282	-397	3634	6567
D8	14	-70	-263	3934	6978
D9	14	-921	-711	3584	6750
D10	14	3072	1534	4705	6787
D11	14	2966	1428	4747	6989
D12	14	1726	770	4037	6336
E1	14	-892	-725	3138	6084
E2	14	-412	-458	3981	7275
E3	14	-871	-724	3402	6513
E4	14	4714	2396	5794	7961
E5	14	4835	2512	6162	8382
E6	14	4656	2375	5947	8147
E7	14	-316	-418	4069	7330
E8	14	317	-40	4247	7373
E9	14	-920	-671	3702	6940
E10	14	2964	1452	4738	6915
E11	14	1887	828	3942	6081
E12	14	2128	996	4166	6376
F1	14	-1837	-1346	-1538	-1280
F2	14	-2308	-1613	-1799	-1498
F3	14	-1893	-1360	-1533	-1264
F4	14	-1370	-1074	-1351	-1099
F5	14	-1466	-1169	-1390	-1147
F6	14	-1286	-1121	-1375	-1121
F7	14	-1747	-1312	-1517	-1238
F8	14	-1790	-1320	-1518	-1217
F9	14	-2504	-1669	-1771	-1401
F10	14	-2611	-1771	-1975	-1607
F11	14	-3147	-2013	-2110	-1712
F12	14	-2702	-1763	-1958	-1587
G1	14	-2249	-1578	-1774	-1498
G2	14	-2537	-1745	-1913	-1572
G3	14	-3372	-2233	-2374	-1945
G4	14	-2343	-1677	-1788	-1482
G5	14	-2072	-1570	-1771	-1484
G6	14	-1640	-1122	-973	-378
G7	14	-2669	-1938	-2068	-1700
G8	14	-2045	-1595	-1675	-1274
G9	14	-1279	-997	-1042	-716
G10	14	-3458	-2218	-2305	-1815
G11	14	-4047	-2596	-2747	-2220
G12	14	-3053	-1962	-2065	-1634
H1	14	-1625	-1192	-1311	-982
H2	14	-2646	-1786	-1924	-1554
H3	14	-2433	-1656	-1766	-1435
H4	14	-2585	-1747	-1851	-1219
H5	14	-1061	-1024	-1220	-1008
H6	14	-1468	-1223	-1369	-1086
H7	14	20526	14469	18090	18245
H8	14	-2662	-1829	-1846	-1198
H9	14	-2612	-1746	-1769	-1349
H10	14	-3283	-2141	-2238	-1769
H11	14	-2719	-1793	-1867	-1433
H12	14	-3568	-2271	-2325	-1828
A1	15	42	-250	3441	6241
A2	15	968	176	4074	6965
A3	15	-659	-664	3344	6387
A4	15	3406	1623	4608	6554
A5	15	3781	1877	5169	7303
A6	15	4459	2273	5936	8246
A7	15	-108	-348	4159	8379
A8	15	225	416	4921	7935
A9	15	-569	-460	3746	6873
A10	15	1150	452	2987	4876
A11	15	1633	682	3157	4984
A12	15	1448	640	3180	5040
B1	15	-83	-305	3319	6022
B2	15	-1247	-960	2807	5798
B3	15	-872	-689	3145	6044
B4	15	3461	1692	5069	7240
B5	15	4069	2035	5551	7770
B6	15	4095	2092	5809	8124
B7	15	-609	-583	3312	6260
B8	15	605	286	4704	7821
B9	15	-513	-282	3740	6552
B10	15	3883	1863	5108	7273
B11	15	3328	1564	4365	6200
B12	15	3613	1750	4681	6627
C1	15	-282	-482	3041	5690
C2	15	-394	-535	2711	5218
C3	15	-1746	-1191	2021	4540
C4	15	5049	2585	6163	8324
C5	15	4863	2401	5946	8132
C6	15	4973	2565	6135	8239
C7	15	-1173	-910	3160	6202
C8	15	-480	-506	3644	6760
C9	15	-1466	-1027	2726	5621
C10	15	4039	2059	5387	7484
C11	15	3000	1461	4350	6225
C12	15	2888	1431	4443	6479
D1	15	-286	-387	3280	6069
D2	15	-132	-236	3614	6467
D3	15	-541	-496	3693	6834
D4	15	4304	2186	5654	7852
D5	15	4730	2388	5974	8174
D6	15	4720	2416	5822	7867
D7	15	-156	-339	3666	6591
D8	15	10	-235	3941	6950
D9	15	-823	-659	3583	6738
D10	15	3213	1618	4746	6790
D11	15	3091	1502	4777	6979
D12	15	1846	822	4055	6318
E1	15	-824	-703	3143	6061
E2	15	-402	-455	3939	7205
E3	15	-829	-696	3396	6477
E4	15	4764	2416	5824	8002
E5	15	4854	2512	6162	8385
E6	15	4635	2353	5931	8135
E7	15	-277	-391	4058	7314
E8	15	343	-28	4241	7321
E9	15	-899	-658	3681	6919
E10	15	2969	1446	4694	6880
E11	15	1891	811	3917	6040
E12	15	2082	989	4109	6300
F1	15	-1874	-1360	-1549	-1291
F2	15	-2337	-1632	-1813	-1522
F3	15	-1933	-1365	-1549	-1279
F4	15	-1371	-1075	-1346	-1103
F5	15	-1509	-1181	-1384	-1159
F6	15	-1317	-1132	-1370	-1151
F7	15	-1759	-1338	-1525	-1259
F8	15	-1825	-1339	-1532	-1236
F9	15	-2544	-1690	-1814	-1413
F10	15	-2677	-1836	-1987	-1610
F11	15	-3174	-2016	-2124	-1715
F12	15	-2748	-1802	-1973	-1603
G1	15	-2240	-1589	-1781	-1481
G2	15	-2542	-1741	-1897	-1579
G3	15	-3378	-2241	-2390	-1949
G4	15	-2330	-1664	-1782	-1465
G5	15	-2080	-1573	-1770	-1468
G6	15	-1659	-1132	-974	-383
G7	15	-2678	-1946	-2071	-1702
G8	15	-2063	-1608	-1686	-1264
G9	15	-1300	-989	-1027	-720
G10	15	-3458	-2241	-2298	-1817
G11	15	-4038	-2609	-2741	-2222
G12	15	-3071	-1964	-2063	-1643
H1	15	-1648	-1201	-1323	-1002
H2	15	-2635	-1797	-1930	-1563
H3	15	-2436	-1665	-1771	-1437
H4	15	-2576	-1761	-1858	-1224
H5	15	-1080	-1025	-1214	-1017
H6	15	-1498	-1226	-1367	-1083
H7	15	20480	14429	18073	18221
H8	15	-2671	-1829	-1847	-1199
H9	15	-2624	-1743	-1789	-1355
H10	15	-3279	-2158	-2230	-1768
H11	15	-2725	-1787	-1866	-1431
H12	15	-3571	-2258	-2342	-1819
A1	16	301	-137	3514	6257
A2	16	1183	287	4101	6949
A3	16	-489	-571	3385	6400
A4	16	3509	1652	4614	6552
A5	16	3841	1906	5164	7266
A6	16	4571	2315	5974	8262
A7	16	188	-200	4258	8446
A8	16	423	494	4963	7938
A9	16	-318	-314	3816	6895
A10	16	1412	595	3061	4906
A11	16	1850	778	3210	4966
A12	16	1641	733	3190	5007
B1	16	42	-232	3350	6054
B2	16	-1129	-929	2817	5751
B3	16	-725	-610	3183	6056
B4	16	3516	1712	5041	7204
B5	16	4183	2082	5568	7764
B6	16	4201	2127	5839	8103
B7	16	-247	-409	3416	6321
B8	16	845	399	4777	7852
B9	16	-315	-191	3772	6538
B10	16	4730	2255	5343	7356
B11	16	4072	1917	4570	6294
B12	16	4189	2020	4803	6606
C1	16	153	-280	3222	5845
C2	16	-152	-412	2797	5256
C3	16	-1515	-1080	2065	4583
C4	16	5198	2654	6190	8306
C5	16	5048	2500	6021	8162
C6	16	5168	2651	6171	8241
C7	16	-1027	-832	3207	6225
C8	16	-348	-460	3684	6776
C9	16	-1354	-966	2772	5645
C10	16	4335	2177	5452	7513
C11	16	3236	1554	4385	6216
C12	16	3098	1505	4471	6434
D1	16	-169	-319	3325	6093
D2	16	-27	-152	3701	6546
D3	16	-385	-440	3741	6841
D4	16	4410	2226	5672	7857
D5	16	4841	2436	6016	8187
D6	16	4774	2449	5816	7839
D7	16	94	-211	3729	6600
D8	16	241	-127	4002	6977
D9	16	-627	-561	3651	6768
D10	16	3512	1733	4790	6794
D11	16	3349	1601	4811	6938
D12	16	2043	911	4072	6276
E1	16	-643	-611	3188	6074
E2	16	-305	-408	3949	7189
E3	16	-702	-639	3430	6502
E4	16	4892	2484	5916	8090
E5	16	4847	2518	6144	8322
E6	16	4654	2356	5900	8082
E7	16	-159	-336	4088	7306
E8	16	455	26	4261	7333
E9	16	-781	-611	3720	6925
E10	16	2999	1468	4670	6827
E11	16	1929	827	3918	6028
E12	16	2146	1008	4118	6297
F1	16	-1894	-1381	-1548	-1292
F2	16	-2425	-1669	-1855	-1536
F3	16	-1936	-1369	-1556	-1273
F4	16	-1404	-1098	-1355	-1136
F5	16	-1511	-1193	-1397	-1161
F6	16	-1363	-1164	-1388	-1167
F7	16	-1782	-1344	-1533	-1261
F8	16	-1827	-1356	-1537	-1257
F9	16	-2567	-1702	-1805	-1422
F10	16	-2696	-1839	-2022	-1622
F11	16	-3198	-2043	-2157	-1717
F12	16	-2793	-1834	-1997	-1618
G1	16	-2247	-1601	-1779	-1504
G2	16	-2548	-1730	-1903	-1576
G3	16	-3388	-2250	-2383	-1939
G4	16	-2348	-1670	-1793	-1474
G5	16	-2070	-1585	-1771	-1489
G6	16	-1699	-1172	-1001	-419
G7	16	-2685	-1921	-2079	-1704
G8	16	-2074	-1616	-1700	-1289
G9	16	-1311	-1003	-1046	-734
G10	16	-3470	-2230	-2297	-1805
G11	16	-4069	-2596	-2748	-2230
G12	16	-3083	-1970	-2074	-1650
H1	16	-1657	-1200	-1326	-998
H2	16	-2662	-1805	-1917	-1555
H3	16	-2443	-1674	-1759	-1428
H4	16	-2591	-1758	-1859	-1222
H5	16	-1076	-1026	-1232	-1007
H6	16	-1506	-1230	-1383	-1077
H7	16	20389	14364	17999	18148
H8	16	-2685	-1838	-1835	-1212
H9	16	-2631	-1759	-1784	-1353
H10	16	-3286	-2153	-2242	-1772
H11	16	-2730	-1789	-1863	-1438
H12	16	-3576	-2271	-2333	-1838
A1	17	796	91	3662	6301
A2	17	1624	481	4228	6971
A3	17	-144	-417	3450	6418
A4	17	3743	1744	4672	6571
A5	17	4050	1995	5223	7277
A6	17	4785	2411	6006	8238
A7	17	744	61	4401	8523
A8	17	845	701	5052	7951
A9	17	200	-79	3971	6920
A10	17	1976	854	3232	4983
A11	17	2358	1013	3346	5017
A12	17	2175	968	3354	5104
B1	17	339	-92	3422	6055
B2	17	-891	-803	2864	5745
B3	17	-474	-492	3247	6074
B4	17	3721	1804	5069	7189
B5	17	4401	2171	5629	7762
B6	17	4467	2258	5926	8184
B7	17	439	-82	3630	6406
B8	17	1359	640	4918	7904
B9	17	99	5	3894	6613
B10	17	6404	3033	5803	7553
B11	17	5496	2572	4984	6457
B12	17	5405	2583	5117	6709
C1	17	912	71	3433	5896
C2	17	353	-191	2911	5290
C3	17	-1135	-936	2164	4579
C4	17	5589	2829	6271	8322
C5	17	5458	2691	6131	8244
C6	17	5586	2853	6311	8333
C7	17	-684	-691	3284	6234
C8	17	-110	-339	3763	6814
C9	17	-1180	-877	2818	5635
C10	17	4923	2468	5627	7547
C11	17	3767	1802	4527	6274
C12	17	3564	1714	4555	6432
D1	17	118	-192	3411	6122
D2	17	170	-93	3753	6554
D3	17	-106	-310	3826	6890
D4	17	4656	2341	5739	7898
D5	17	5038	2529	6035	8198
D6	17	4948	2532	5896	7877
D7	17	648	45	3904	6677
D8	17	641	68	4096	6988
D9	17	-213	-390	3761	6810
D10	17	4164	2031	4979	6868
D11	17	3983	1894	4969	7004
D12	17	2531	1107	4195	6304
E1	17	-258	-438	3318	6141
E2	17	-74	-294	4017	7219
E3	17	-416	-506	3494	6503
E4	17	4973	2513	5923	8068
E5	17	4993	2563	6179	8357
E6	17	4726	2390	5913	8068
E7	17	56	-230	4146	7326
E8	17	651	113	4272	7293
E9	17	-573	-517	3779	6951
E10	17	3222	1549	4740	6865
E11	17	2076	890	3925	6007
E12	17	2301	1097	4173	6341
F1	17	-1904	-1377	-1558	-1293
F2	17	-2453	-1688	-1864	-1546
F3	17	-1965	-1394	-1563	-1280
F4	17	-1400	-1099	-1364	-1117
F5	17	-1533	-1193	-1404	-1162
F6	17	-1396	-1180	-1422	-1179
F7	17	-1827	-1355	-1550	-1276
F8	17	-1871	-1372	-1558	-1237
F9	17	-2598	-1723	-1840	-1439
F10	17	-2751	-1854	-2034	-1635
F11	17	-3224	-2064	-2167	-1739
F12	17	-2800	-1834	-1993	-1627
G1	17	-2252	-1594	-1788	-1495
G2	17	-2559	-1753	-1913	-1579
G3	17	-3402	-2259	-2402	-1957
G4	17	-2354	-1676	-1800	-1479
G5	17	-2082	-1585	-1777	-1488
G6	17	-1711	-1160	-1018	-421
G7	17	-2685	-1942	-2084	-1709
G8	17	-2099	-1635	-1702	-1296
G9	17	-1330	-1022	-1049	-734
G10	17	-3473	-2237	-2298	-1819
G11	17	-4062	-2612	-2753	-2230
G12	17	-3076	-1995	-2080	-1653
H1	17	-1653	-1208	-1311	-1000
H2	17	-2675	-1802	-1925	-1569
H3	17	-2457	-1678	-1782	-1440
H4	17	-2612	-1768	-1868	-1224
H5	17	-1090	-1045	-1216	-1014
H6	17	-1494	-1240	-1374	-1086
H7	17	20331	14339	17959	18113
H8	17	-2693	-1843	-1850	-1196
H9	17	-2638	-1779	-1780	-1348
H10	17	-3311	-2155	-2239	-1779
H11	17	-2730	-1787	-1867	-1437
H12	17	-3602	-2255	-2340	-1848
A1	18	1748	543	3963	6463
A2	18	2521	909	4473	7072
A3	18	545	-82	3646	6485
A4	18	4209	1989	4796	6584
A5	18	4464	2189	5328	7324
A6	18	5258	2633	6141	8316
A7	18	1858	599	4754	8673
A8	18	1712	1103	5311	8044
A9	18	1243	411	4260	7043
A10	18	3115	1397	3560	5144
A11	18	3420	1524	3672	5152
A12	18	3203	1479	3672	5202
B1	18	896	177	3527	6046
B2	18	-377	-561	3017	5837
B3	18	93	-235	3427	6159
B4	18	4130	1991	5184	7230
B5	18	4916	2420	5778	7849
B6	18	4952	2469	6066	8225
B7	18	1799	568	4032	6587
B8	18	2344	1114	5198	8027
B9	18	889	381	4121	6710
B10	18	9578	4516	6708	7918
B11	18	8098	3782	5693	6725
B12	18	7839	3713	5827	7019
C1	18	2391	755	3886	6129
C2	18	1300	255	3218	5405
C3	18	-336	-522	2406	4672
C4	18	6350	3166	6477	8403
C5	18	6210	3033	6303	8273
C6	18	6421	3228	6561	8456
C7	18	-20	-364	3496	6366
C8	18	401	-97	3916	6876
C9	18	-756	-688	2931	5675
C10	18	6102	2989	5932	7684
C11	18	4880	2314	4829	6377
C12	18	4631	2217	4877	6554
D1	18	617	41	3590	6214
D2	18	524	70	3799	6528
D3	18	431	-51	3967	6914
D4	18	5133	2550	5874	7921
D5	18	5456	2721	6158	8231
D6	18	5368	2710	5995	7931
D7	18	1690	541	4194	6802
D8	18	1519	463	4360	7107
D9	18	561	-26	3971	6899
D10	18	5448	2633	5320	6983
D11	18	5258	2492	5335	7146
D12	18	3492	1574	4466	6396
E1	18	473	-102	3523	6232
E2	18	380	-97	4138	7234
E3	18	128	-258	3660	6568
E4	18	5199	2616	6000	8116
E5	18	5292	2702	6286	8425
E6	18	4984	2517	5982	8111
E7	18	557	-11	4310	7429
E8	18	1132	328	4422	7361
E9	18	-126	-302	3907	6989
E10	18	3583	1715	4816	6854
E11	18	2405	1037	3998	6023
E12	18	2549	1197	4212	6328
F1	18	-1949	-1390	-1587	-1312
F2	18	-2444	-1689	-1857	-1544
F3	18	-1978	-1384	-1560	-1280
F4	18	-1409	-1100	-1358	-1125
F5	18	-1536	-1198	-1412	-1156
F6	18	-1414	-1199	-1422	-1183
F7	18	-1849	-1371	-1545	-1259
F8	18	-1890	-1383	-1569	-1263
F9	18	-2632	-1749	-1855	-1458
F10	18	-2733	-1867	-2032	-1636
F11	18	-3250	-2065	-2169	-1737
F12	18	-2835	-1854	-2018	-1645
G1	18	-2254	-1608	-1794	-1498
G2	18	-2574	-1747	-1914	-1588
G3	18	-3405	-2265	-2410	-1953
G4	18	-2370	-1679	-1794	-1476
G5	18	-2105	-1601	-1781	-1479
G6	18	-1699	-1148	-1006	-415
G7	18	-2703	-1943	-2080	-1704
G8	18	-2108	-1625	-1703	-1273
G9	18	-1331	-1030	-1053	-744
G10	18	-3483	-2240	-2298	-1825
G11	18	-4063	-2609	-2754	-2236
G12	18	-3100	-1984	-2087	-1665
H1	18	-1664	-1211	-1325	-1003
H2	18	-2677	-1789	-1926	-1557
H3	18	-2479	-1687	-1784	-1453
H4	18	-2601	-1777	-1858	-1227
H5	18	-1097	-1035	-1229	-1025
H6	18	-1502	-1236	-1386	-1086
H7	18	20329	14326	17971	18107
H8	18	-2692	-1832	-1854	-1203
H9	18	-2648	-1756	-1795	-1369
H10	18	-3284	-2161	-2230	-1774
H11	18	-2736	-1813	-1879	-1448
H12	18	-3596	-2276	-2337	-1840
A1	19	3607	1416	4492	6668
A2	19	4317	1757	5003	7286
A3	19	1924	547	4072	6655
A4	19	5200	2424	5087	6711
A5	19	5294	2578	5540	7376
A6	19	6230	3075	6419	8415
A7	19	4018	1610	5420	8986
A8	19	3408	1903	5813	8254
A9	19	3274	1374	4883	7329
A10	19	5256	2420	4208	5434
A11	19	5409	2453	4238	5393
A12	19	5179	2403	4254	5463
B1	19	2119	723	3922	6215
B2	19	613	-111	3282	5907
B3	19	1207	285	3744	6305
B4	19	5014	2406	5452	7339
B5	19	5862	2859	6017	7908
B6	19	5942	2934	6337	8338
B7	19	4415	1811	4837	6941
B8	19	4286	2031	5793	8291
B9	19	2437	1097	4549	6860
B10	19	15267	7137	8306	8615
B11	19	13013	6086	7150	7358
B12	19	12232	5750	7094	7546
C1	19	5105	2011	4655	6421
C2	19	3174	1121	3750	5635
C3	19	1189	194	2849	4848
C4	19	7901	3875	6928	8568
C5	19	7855	3789	6824	8544
C6	19	8022	3989	7024	8661
C7	19	1234	232	3875	6493
C8	19	1406	379	4235	7020
C9	19	56	-294	3162	5784
C10	19	8422	4067	6597	7970
C11	19	7014	3305	5449	6642
C12	19	6654	3161	5443	6777
D1	19	1566	485	3818	6272
D2	19	1353	471	4086	6693
D3	19	1499	458	4281	7042
D4	19	6070	2985	6132	8028
D5	19	6361	3129	6420	8362
D6	19	6082	3040	6201	8002
D7	19	3738	1515	4812	7078
D8	19	3191	1262	4874	7329
D9	19	2095	715	4428	7072
D10	19	7930	3799	6048	7289
D11	19	7690	3611	6012	7412
D12	19	5375	2436	4991	6603
E1	19	1861	558	3926	6387
E2	19	1339	364	4429	7388
E3	19	1201	244	3955	6674
E4	19	5663	2833	6133	8183
E5	19	5884	2989	6444	8477
E6	19	5415	2717	6084	8135
E7	19	1462	429	4564	7524
E8	19	2069	780	4685	7478
E9	19	775	121	4165	7088
E10	19	4427	2107	5051	6933
E11	19	3080	1352	4178	6098
E12	19	3144	1470	4386	6389
F1	19	-1963	-1416	-1585	-1321
F2	19	-2477	-1708	-1872	-1552
F3	19	-1989	-1411	-1590	-1298
F4	19	-1430	-1101	-1374	-1129
F5	19	-1570	-1223	-1432	-1177
F6	19	-1446	-1201	-1436	-1195
F7	19	-1855	-1387	-1565	-1290
F8	19	-1916	-1424	-1581	-1264
F9	19	-2657	-1747	-1867	-1461
F10	19	-2769	-1866	-2054	-1660
F11	19	-3299	-2079	-2191	-1751
F12	19	-2827	-1828	-2010	-1616
G1	19	-2259	-1590	-1782	-1492
G2	19	-2574	-1749	-1916	-1581
G3	19	-3426	-2253	-2384	-1958
G4	19	-2354	-1665	-1798	-1479
G5	19	-2108	-1597	-1773	-1486
G6	19	-1720	-1169	-1017	-435
G7	19	-2716	-1957	-2077	-1713
G8	19	-2096	-1619	-1704	-1295
G9	19	-1342	-1017	-1061	-730
G10	19	-3495	-2260	-2312	-1805
G11	19	-4058	-2610	-2751	-2233
G12	19	-3094	-1991	-2087	-1648
H1	19	-1676	-1209	-1330	-1001
H2	19	-2669	-1799	-1921	-1555
H3	19	-2463	-1677	-1797	-1443
H4	19	-2627	-1781	-1860	-1225
H5	19	-1106	-1050	-1242	-1020
H6	19	-1511	-1247	-1385	-1084
H7	19	20250	14283	17893	18083
H8	19	-2697	-1842	-1849	-1211
H9	19	-2650	-1753	-1785	-1360
H10	19	-3286	-2155	-2240	-1786
H11	19	-2753	-1810	-1885	-1448
H12	19	-3583	-2264	-2323	-1850
A1	20	7119	3016	5541	7117
A2	20	7659	3324	6026	7752
A3	20	4549	1810	4857	7006
A4	20	7109	3290	5615	6944
A5	20	6965	3343	6028	7607
A6	20	8095	3955	6956	8662
A7	20	8033	3523	6616	9520
A8	20	6516	3398	6727	8656
A9	20	7023	3170	5997	7817
A10	20	9147	4259	5402	5958
A11	20	9011	4158	5307	5833
A12	20	8745	4092	5338	5939
B1	20	4383	1775	4561	6502
B2	20	2525	779	3841	6116
B3	20	3294	1268	4373	6580
B4	20	6653	3144	5860	7452
B5	20	7802	3749	6590	8176
B6	20	7916	3865	6927	8607
B7	20	9176	4076	6267	7591
B8	20	7952	3764	6901	8777
B9	20	5382	2508	5417	7248
B10	20	24583	11452	10983	9784
B11	20	21182	9889	9575	8480
B12	20	19569	9167	9229	8474
C1	20	10000	4253	6078	7031
C2	20	6648	2742	4780	6123
C3	20	4091	1571	3741	5242
C4	20	10823	5205	7722	8929
C5	20	10901	5191	7716	8934
C6	20	11058	5405	7908	9054
C7	20	3656	1396	4603	6813
C8	20	3356	1306	4832	7313
C9	20	1630	448	3620	5961
C10	20	12699	6060	7818	8478
C11	20	10920	5134	6568	7112
C12	20	10397	4888	6543	7226
D1	20	3425	1345	4367	6504
D2	20	2943	1216	4597	6964
D3	20	3580	1414	4903	7319
D4	20	7914	3835	6647	8256
D5	20	8047	3907	6890	8536
D6	20	7583	3741	6627	8193
D7	20	7544	3307	5930	7565
D8	20	6373	2792	5833	7764
D9	20	5009	2082	5300	7455
D10	20	12460	5899	7323	7833
D11	20	12130	5665	7250	7935
D12	20	8818	4021	5960	7003
E1	20	4506	1776	4676	6680
E2	20	3176	1214	5015	7686
E3	20	3273	1217	4562	6960
E4	20	6614	3265	6408	8302
E5	20	7052	3511	6788	8656
E6	20	6331	3131	6347	8233
E7	20	3269	1280	5122	7761
E8	20	3800	1590	5167	7648
E9	20	2481	931	4668	7320
E10	20	6090	2894	5533	7161
E11	20	4404	1967	4541	6227
E12	20	4283	1998	4695	6496
F1	20	-1993	-1421	-1611	-1319
F2	20	-2507	-1715	-1874	-1566
F3	20	-2011	-1406	-1582	-1299
F4	20	-1451	-1115	-1371	-1138
F5	20	-1565	-1217	-1418	-1174
F6	20	-1464	-1214	-1460	-1210
F7	20	-1875	-1398	-1572	-1277
F8	20	-1963	-1430	-1593	-1282
F9	20	-2666	-1767	-1870	-1460
F10	20	-2766	-1886	-2049	-1647
F11	20	-3301	-2100	-2193	-1769
F12	20	-2852	-1857	-2029	-1634
G1	20	-2259	-1604	-1786	-1507
G2	20	-2560	-1751	-1932	-1588
G3	20	-3411	-2261	-2407	-1966
G4	20	-2355	-1673	-1801	-1477
G5	20	-2122	-1590	-1780	-1496
G6	20	-1731	-1182	-1026	-441
G7	20	-2714	-1950	-2106	-1720
G8	20	-2100	-1634	-1712	-1280
G9	20	-1348	-1027	-1071	-751
G10	20	-3493	-2272	-2322	-1834
G11	20	-4079	-2613	-2762	-2229
G12	20	-3114	-1995	-2100	-1653
H1	20	-1675	-1224	-1344	-986
H2	20	-2678	-1816	-1946	-1582
H3	20	-2479	-1684	-1802	-1450
H4	20	-2611	-1783	-1854	-1242
H5	20	-1107	-1054	-1225	-1021
H6	20	-1511	-1260	-1374	-1088
H7	20	20258	14286	17909	18094
H8	20	-2704	-1845	-1864	-1212
H9	20	-2667	-1767	-1792	-1381
H10	20	-3302	-2162	-2245	-1779
H11	20	-2757	-1811	-1872	-1439
H12	20	-3600	-2292	-2332	-1842
A1	21	13229	5853	7382	7978
A2	21	13607	6116	7857	8592
A3	21	9342	4057	6316	7645
A4	21	10687	4927	6618	7363
A5	21	10117	4774	6897	7964
A6	21	11676	5618	8013	9131
A7	21	15220	6933	8790	10529
A8	21	12024	5998	8379	9384
A9	21	13689	6326	8011	8710
A10	21	15616	7321	7354	6855
A11	21	15152	7048	7141	6684
A12	21	14721	6896	7124	6760
B1	21	8526	3708	5796	7056
B2	21	6090	2464	4938	6635
B3	21	7213	3100	5564	7111
B4	21	9897	4655	6806	7883
B5	21	11310	5334	7539	8520
B6	21	11636	5597	8039	9114
B7	21	17230	7899	8727	8718
B8	21	14499	6879	8876	9693
B9	21	10793	5042	7061	8005
B10	21	37825	17509	14762	11469
B11	21	32503	15107	12809	9897
B12	21	30343	14118	12388	9909
C1	21	18073	7992	8503	8194
C2	21	12620	5523	6588	6963
C3	21	9121	3934	5249	5917
C4	21	16199	7663	9278	9586
C5	21	16555	7825	9400	9751
C6	21	16626	8009	9566	9820
C7	21	8183	3562	5975	7447
C8	21	7016	3048	5964	7834
C9	21	4669	1900	4553	6403
C10	21	20161	9498	9972	9436
C11	21	17719	8294	8517	7975
C12	21	17013	7963	8513	8121
D1	21	7008	3020	5465	7034
D2	21	5881	2588	5468	7357
D3	21	7463	3243	6093	7864
D4	21	11407	5456	7649	8692
D5	21	11385	5467	7880	8980
D6	21	10464	5086	7468	8568
D7	21	14214	6468	7915	8464
D8	21	12149	5499	7549	8583
D9	21	10341	4624	6887	8177
D10	21	20114	9466	9566	8822
D11	21	19948	9276	9541	8960
D12	21	14864	6809	7738	7789
E1	21	9419	4044	6179	7399
E2	21	6544	2810	6013	8112
E3	21	7163	3038	5727	7475
E4	21	8355	4072	6902	8514
E5	21	9205	4526	7391	8878
E6	21	8158	3960	6856	8451
E7	21	6679	2902	6141	8234
E8	21	7221	3226	6230	8140
E9	21	5707	2461	5634	7743
E10	21	9263	4355	6481	7601
E11	21	6994	3158	5307	6582
E12	21	6597	3088	5405	6814
F1	21	-1987	-1406	-1599	-1351
F2	21	-2547	-1726	-1894	-1566
F3	21	-2012	-1409	-1584	-1288
F4	21	-1473	-1128	-1383	-1145
F5	21	-1604	-1231	-1440	-1170
F6	21	-1501	-1227	-1457	-1208
F7	21	-1884	-1404	-1587	-1297
F8	21	-1971	-1444	-1594	-1273
F9	21	-2699	-1787	-1874	-1469
F10	21	-2772	-1892	-2045	-1656
F11	21	-3320	-2113	-2220	-1768
F12	21	-2883	-1887	-2041	-1637
G1	21	-2271	-1608	-1791	-1499
[truncated: 13,079 more rows]

## Sheet: BioGroup Analysis Result
Block Type	96well
Chemistry	SYBR_GREEN
Experiment File Name	D:\Applied Biosystems\StepOne Software v2.3\experiments\ishishita\180115_17hALAS1_WildvsMut.eds
Experiment Run End Time	2019-01-15 10:58:42 AM PST
Instrument Type	steponeplus
Passive Reference	ROX
Biogroup Name	Target Name	Task	RQ	RQ Min	RQ Max	Cт Mean	ΔCт Mean	ΔCт SE	ΔΔCт
we	actb	UNKNOWN				20.8532
we	ALAS1_2F2R	UNKNOWN	1	0.733509	1.36331	22.784	1.93085	0.218274	0
wt	actb	UNKNOWN				20.9216
wt	ALAS1_2F2R	UNKNOWN	3.23693	2.12034	4.94153	21.1578	0.236219	0.297954	-1.69463
Analysis Type	Singleplex
Endogenous Control	actb
RQ Min/Max Confidence Level	95.0
Reference Biogroup Name	we
														Mut	1	0.733509	1.36331	0.266491	0.36331
														Wild	3.23693	2.12034	4.94153	1.11659	1.7046

## Sheet: Technical Analysis Result
Block Type	96well
Chemistry	SYBR_GREEN
Experiment File Name	D:\Applied Biosystems\StepOne Software v2.3\experiments\ishishita\180115_17hALAS1_WildvsMut.eds
Experiment Run End Time	2019-01-15 10:58:42 AM PST
Instrument Type	steponeplus
Passive Reference	ROX
Sample Name	Target Name	Task	RQ	RQ Min	RQ Max	Cт Mean	ΔCт Mean	ΔCт SE	ΔΔCт
17hWE1	actb	UNKNOWN				20.5804
17hWE1	ALAS1_2F2R	UNKNOWN	1	0.66062	1.51373	22.6228	2.0424	0.215422	0
17hqPCR2	actb	UNKNOWN				20.6392
17hqPCR2	ALAS1_2F2R	UNKNOWN	3.47718	2.60192	4.64688	20.8837	0.244479	0.150676	-1.79792
17hWE2	actb	UNKNOWN				21.0698
17hWE2	ALAS1_2F2R	UNKNOWN	1.35061	1.1701	1.55895	22.6786	1.60879	0.0745452	-0.433606
17hP1	actb	UNKNOWN				20.4216
17hP1	ALAS1_2F2R	UNKNOWN	6.34524	3.72783	10.8004	19.7984	-0.623278	0.276375	-2.66568
17hWE3	actb	UNKNOWN				19.9345
17hWE3	ALAS1_2F2R	UNKNOWN	0.974694	0.717001	1.325	22.0139	2.07938	0.159547	0.0369784
17hP2	actb	UNKNOWN				21.2727
17hP2	ALAS1_2F2R	UNKNOWN	4.44073	3.17589	6.20931	21.1643	-0.1084	0.174192	-2.1508
17hWE4	actb	UNKNOWN				21.439
17hWE4	ALAS1_2F2R	UNKNOWN	1.5224	1.13406	2.04372	22.8751	1.43605	0.153019	-0.606351
17hP3	actb	UNKNOWN				20.6146
17hP3	ALAS1_2F2R	UNKNOWN	2.94051	2.00662	4.30903	21.1009	0.486332	0.198562	-1.55607
17hWE5	actb	UNKNOWN				21.2421
17hWE5	ALAS1_2F2R	UNKNOWN	0.734473	0.440703	1.22407	23.7297	2.48762	0.265412	0.445218
17hP4	actb	UNKNOWN				21.6599
17hP4	ALAS1_2F2R	UNKNOWN	1.81559	1.48645	2.2176	22.8419	1.18196	0.103933	-0.860437
	actb	NTC
	ALAS1_2F2R	NTC
Analysis Type	Singleplex
Endogenous Control	actb
RQ Min/Max Confidence Level	95.0
Reference Sample	17hWE1
